1           **The *Borrelia burgdorferi* adenylyl cyclase, CyaB, is important for**  
2           **virulence factor production and mammalian infection**

3   Running Title: CyaB role in borrelial pathogenesis

4   **Vanessa M. Ante<sup>1</sup>, Lauren C. Farris<sup>1</sup>, Elizabeth P. Saputra<sup>1</sup>, Allie J. Hall<sup>2</sup>, Nathaniel S.**  
5   **O'Bier<sup>3</sup>, Adela S. Oliva Chavez<sup>4</sup>, Richard T. Marconi<sup>3</sup>, Meghan C. Lybecker<sup>2</sup>, and Jenny A.**  
6   **Hyde<sup>1\*</sup>**

7   <sup>1</sup> Texas A&M University Health Science Center, Department of Microbial Pathogenesis and  
8   Immunology, Bryan, TX, USA

9   <sup>2</sup> University of Colorado at Colorado Springs, Department of Biology, Colorado Springs, CO, USA

10   <sup>3</sup> Virginia Commonwealth University Medical Center, Department of Microbiology and  
11   Immunology, Richmond, VA, USA

12   <sup>4</sup> Texas A&M University, Department of Entomology, College Station, TX, USA

13   **\* Correspondence:**  
14   Jenny Hyde, Ph.D.  
15   jhyde@tamu.edu

16   **Key words: CyaB, adenylate cyclase, *Borrelia burgdorferi*, cAMP, small RNA, cyclic**  
17   **nucleotides, Lyme disease, and secondary messenger**

18 **Abstract.**

19 *Borrelia burgdorferi*, the causative agent of Lyme disease, traverses through vastly distinct  
20 environments between the tick vector and the multiple phases of the mammalian infection that  
21 requires genetic adaptation for the progression of pathogenesis. Borrelial gene expression is highly  
22 responsive to changes in specific environmental signals that initiate the RpoS regulon for  
23 mammalian adaptation, but the mechanism(s) for direct detection of environmental cues has yet to  
24 be identified. Secondary messenger cyclic adenosine monophosphate (cAMP) produced by  
25 adenylate cyclase is responsive to environmental signals, such as carbon source and pH, in many  
26 bacterial pathogens to promote virulence by altering gene regulation. *B. burgdorferi* encodes a  
27 single non-toxin class IV adenylate cyclase (*bb0723*, *cyaB*). This study investigates *cyaB*  
28 expression along with its influence on borrelial virulence regulation and mammalian infectivity.  
29 Expression of *cyaB* was specifically induced with co-incubation of mammalian host cells that was  
30 not observed with cultivated tick cells suggesting that *cyaB* expression is influenced by cellular  
31 factor(s) unique to mammalian cell lines. The 3' end of *cyaB* also encodes a small RNA, SR0623,  
32 in the same orientation that overlaps with *bb0722*. The differential processing of *cyaB* and SR0623  
33 transcripts may alter the ability to influence function in the form of virulence determinant  
34 regulation and infectivity. Two independent *cyaB* deletion B31 strains were generated in 5A4-NP1  
35 and ML23 backgrounds and complemented with the *cyaB* ORF alone that truncates SR0623, *cyaB*  
36 with intact SR0623, or *cyaB* with a mutagenized full length SR0623 to evaluate the influence on  
37 transcriptional and post-transcriptional regulation of borrelial virulence factors and infectivity. In  
38 the absence of *cyaB*, expression and production of *ospC* was significantly reduced, while the  
39 protein levels for BosR and DbpA were substantially lower than parental strains. Infectivity studies  
40 with both independent *cyaB* mutants demonstrated an attenuated phenotype with reduced  
41 colonization of tissues during early disseminated infection. This work suggests that *B. burgdorferi*  
42 utilizes *cyaB* and potentially cAMP as a regulatory pathway to modulate borrelial gene expression  
43 and protein production to promote borrelial virulence and dissemination in the mammalian host.

44

## 45 Introduction.

46 *Borrelia burgdorferi*, the causative agent of Lyme disease, is an emerging infectious  
47 disease that causes a robust inflammatory multistage disease and accounts for over 80% of all  
48 vector-borne illnesses in the United States (Rosenberg 2018; Radolf et al. 2012; Stanek and Strle  
49 2018; Steere et al. 2016). Localized disease presents as flu-like symptoms and is frequently  
50 associated with an erythema migrans “bull’s-eye” rash (Steere et al. 2016; Stanek and Strle 2018).  
51 If left untreated, the pathogen disseminates to specific tissues with systemic symptoms developing  
52 including arthritis, carditis, and encephalomyelitis (Hu 2016; Steere et al. 2016; Stanek and Strle  
53 2018). Patients experience severe morbidity due to ongoing fatigue and malaise as a result of the  
54 inflammatory response elicited by *B. burgdorferi*. To date, no human vaccine is available and  
55 therapeutics for late stage disease are limited.

56 *B. burgdorferi* lacks classically-defined virulence factors, such as secretion systems and  
57 toxins, and instead relies on dynamic genetic regulation and antigenic variability to invade multiple  
58 tissue types and evade the immune system (Radolf et al. 2012; D. Scott Samuels and Samuels  
59 2016). Many studies have noted the responsiveness of *B. burgdorferi* to environmental signals,  
60 such as temperature, pH, O<sub>2</sub>, CO<sub>2</sub>, and osmotic stress, as it travels from the tick vector to the  
61 mammalian host, but mechanisms of direct environmental detection remain unknown (Carroll,  
62 Garon, and Schwan 1999; Carroll, Cordova, and Garon 2000; Popitsch et al. 2017; Konkel and  
63 Tilly 2000; Stevenson, Schwan, and Rosa 1995; Tokarz et al. 2004; Seshu, Boylan, Gherardini, et  
64 al. 2004; Hyde, Trzeciakowski, and Skare 2007; Bontemps-Gallo, Lawrence, and Gherardini 2016;  
65 X. Yang et al. 2000). The BosR-RpoN-Rrp2-RpoS signaling cascade responds to changing  
66 environmental cues to allow borrelial adaptation during early mammalian infection and resistance  
67 to innate immunity by altering the outer membrane lipoprotein composition (Hyde et al. 2009;  
68 Zhiming Ouyang, Deka, and Norgard 2011; Jon S. Blevins et al. 2009; Hyde et al. 2010; Zhiming  
69 Ouyang et al. 2009; Z. Ouyang, Blevins, and Norgard 2008; A. H. Smith et al. 2007; M. J. Caimano  
70 et al. 2007; 2004; Melissa J. Caimano et al. 2019). Transcription of *rpoS* is regulated by a  
71 transcription complex formed of the RNA polymerase, the sigma factor RpoN, the phosphorylated  
72 Response regulator protein (Rrp2), and the *Borrelia* oxidative stress regulator (BosR) (Xiaofeng  
73 F. Yang, Alani, and Norgard 2003; Jon S. Blevins et al. 2009; Hyde et al. 2009; Zhiming Ouyang,  
74 Deka, and Norgard 2011; Hyde et al. 2010; Zhiming Ouyang et al. 2009; A. H. Smith et al. 2007).  
75 The borrelial RpoS regulon includes outer surface lipoproteins DbpA, OspC, and BBK32, and  
76 other factors important for tick to mouse transmission and survival in mammalian hosts (He et al.  
77 2007, 32; Hübner et al. 2001; Melissa J. Caimano et al. 2005; 2007; X. F. Yang et al. 2005).

78 Secondary messengers are a mechanism used by bacterial pathogens, such as *B.*  
79 *burgdorferi*, to modulate gene expression and post-transcriptional regulation in response to  
80 environmental signals by altering the function of bound proteins (Yin et al. 2020; Purificação et  
81 al. 2020; McDonough and Rodriguez 2011; Savage et al. 2015; Ye et al. 2014; Rogers et al. 2009).  
82 In *B. burgdorferi*, the second messenger cyclic di-adenosine monophosphate (c-di-AMP) is  
83 essential for in vitro growth and the production of mammalian virulence factors (Ye et al. 2014;  
84 Savage et al. 2015). Cyclic di-guanosine monophosphate (c-di-GMP) is a key component of the  
85 Hk1-Rrp1 two-component system pathway involved in mammal to tick transmission, midgut  
86 survival, motility, and glycerol utilization by *B. burgdorferi* (Zhang et al. 2018; Novak, Sultan,  
87 and Motaleb 2014; He et al. 2011; Sultan et al. 2011; Bontemps-Gallo, Lawrence, and Gherardini  
88 2016; Melissa J. Caimano et al. 2015). c-di-GMP is produced by Rrp1 and bound by PlzA to

89 positively regulate glucose metabolism (Rogers et al. 2009; Freedman et al. 2010; Kostick-Dunn  
90 et al. 2018; Kostick et al. 2011; Mallory et al. 2016; Sultan et al. 2010; He et al. 2014). Another  
91 second messenger cyclic adenosine monophosphate (cAMP) has received less attention in *B.*  
92 *burgdorferi*, but has been found to support virulence in other pathogenic bacteria (McDonough  
93 and Rodriguez 2011). cAMP is generated by adenylate cyclases (ACs) to modulate regulation of  
94 the bacteria or the host cell depending on which of the 6 classes of AC. cAMP can bind to cAMP  
95 receptor proteins (CRP) often resulting in a conformation change that promote efficient binding of  
96 specific DNA sites and transcription of numerous genes. *B. burgdorferi* encodes a single class IV  
97 AC (*bb0723*), annotated as *cyaB*, which is the smallest of the classes, highly thermostable, and has  
98 been identified in only 3 other bacterial species (Khajanchi et al. 2016; Gallagher et al. 2006; N.  
99 Smith et al. 2006; Casjens et al. 2000; Dong et al. 2013; Sismeiro et al. 1998). The borrelial genome  
100 lacks an annotated CRP or cAMP phosphodiesterase, therefore it is unclear how *B. burgdorferi*  
101 generated cAMP might modulate the pathogenesis-specific regulation (Casjens et al. 2000). A  
102 previous study confirmed the AC enzymatic activity of recombinant borrelial CyaB (Khajanchi et  
103 al. 2016). During infection studies with a transposon *cyaB* mutant strain, it was found that *cyaB*  
104 did not play a role in tick to mouse transmission or mammalian infectivity when examined  
105 qualitatively by culture outgrowth. A borrelial Tn-seq identified *cyaB* as contributing to resistance  
106 to oxidative stress (Ramsey et al. 2017). The overall function of the CyaB enzyme in *B. burgdorferi*  
107 signal transduction and virulence factor regulation remains unclear, especially in the absence of  
108 any detectable downstream effector molecules that would recognize cAMP.

109 Borrelial *cyaB* overlaps with an intragenic small RNA (sRNA) SR0623 at the 3' end of the  
110 open reading frame (ORF) and extends into the neighboring *bb0722* gene (Popitsch et al. 2017).  
111 sRNAs can be arranged in the genome as antisense, 5' and 3' untranslated region (UTR), intergenic,  
112 or intragenic (Gottesman and Storz 2011; Papenfort and Vogel 2010; Babitzke et al. 2019). sRNAs  
113 have a broad range of function with the ability to regulate translation of target mRNA, degradation  
114 of target mRNA, act as a riboswitch, or bind to proteins either altering or sequestering their  
115 activity. Recent sRNA transcriptome studies identified over 1,000 putative borrelial sRNA that are  
116 regulated in response to temperature shift and nutrient stress (Popitsch et al. 2017; Drecktrah et al.  
117 2018).

118 In this study, we investigated the role of *cyaB* and SR0623 in borrelial pathogenesis. Our  
119 findings indicate that *cyaB* influences mammalian virulence in part through regulation of the  
120 BosR-RpoN-Rrp2-RpoS pathway. The regulation of *cyaB* was specific to interactions with host  
121 cells, further suggesting this AC is important for the mammalian cycle of pathogenesis and may  
122 be responsive to unique host specific signals. CyaB, and possible cAMP signaling, has the potential  
123 to be an uncharacterized signaling and regulation pathway important for the progression of Lyme  
124 disease.

125 **Materials and methods.**

126 **Growth conditions and media.**

127 *E. coli* was grown in Luria-Bertani (LB) broth supplemented with antibiotics at the  
128 following concentrations: kanamycin 50µg/ml, spectinomycin 100µg/ml, or gentamicin 15µg/ml.  
129 *B. burgdorferi* was grown in Barbour-Stoener-Kelly II (BSKII) medium supplemented with 6%  
130 normal rabbit serum (NRS) under microaerophilic conditions at 32°C with 1% CO<sub>2</sub> unless  
131 otherwise stated (Barbour 1984). Modified BSK lacks bovine serum albumin (BSA), pyruvate,  
132 and NRS (Ramsey et al. 2017). BSK-lite was made using CMRL 1066 without L-glutamine and  
133 without glucose (USBiological) supplemented with 6% NRS and 0.01% L-glutamine (von Lackum  
134 and Stevenson 2005). BSK-glycerol is BSK-lite with 0.6% glycerol. BSK media was  
135 supplemented with antibiotics at the following concentrations: kanamycin 300µg/ml, streptomycin  
136 100µg/ml, or gentamicin 50µg/ml.

137 **Plasmid construction and strain generation.**

138 Strains, plasmids, and primers generated in this study are listed in Table 1 & S1,  
139 respectively. The *cyaB* (*bb0723*) deletion construct was generated by amplifying upstream and  
140 downstream regions of approximately 1.5kb and individually TOPO cloned into pCR8  
141 (ThermoFisher) resulting in pJH380 and pJH381, respectively. A KpnI and BamI digest inserted  
142 the downstream region from pJH381 into pJH380 to generate pJH383. The *P<sub>f<sub>l</sub>gB</sub>*-*aadA* was PCR  
143 amplified and cloned into pCR2.1, designated pJH431, and cloned into pJH383 by SphI and KpnI  
144 digest generating the final deletion construct, pJH432. This final construct was transformed into  
145 *B. burgdorferi* ML23 and 5A4-NP1, resulting in JH441 and JH522, respectively (Figure 1)  
146 (Labandeira-Rey and Skare 2001; Lawrenz et al. 2002). A chromosomal *cyaB* complement  
147 construct, pJH446, was generated in the pJH333 backbone that encodes 1.5kb chromosomal  
148 regions to allow allelic exchange between *bb0445* and *bb0446*, using *P<sub>f<sub>l</sub>gB</sub>*-*aacC1* as the antibiotic  
149 selection (Li et al. 2007; Hyde, Weening, and Skare 2011). JH441 was transformed with pJH446  
150 resulting in strain JH446. The mutant and chromosomal complement strains were transformed with  
151 pBBE22*luc* to introduce constitutively expressed bioluminescence (J. S. Blevins et al. 2007; Hyde  
152 et al. 2011).

153 A similar construct, pVA110, was generated by amplifying the upstream *bb0445* fragment  
154 and *P<sub>f<sub>l</sub>gB</sub>*-*aacC1* using primers *bb0445*-F-BamHI/*bb0445*-R and *P<sub>f<sub>l</sub>gB</sub>*-F-NotI/gent-R, respectively  
155 and underwent overlap PCR with *bb0445*-F-BamHI and *P<sub>f<sub>l</sub>gB</sub>*-F-NotI, digested with BamHI and  
156 NotI, and cloned into pJH333. The *cyaB* complement fragment *cyaB* with SR0623 was PCR  
157 amplified using the indicated primers in Table S1, digested with NotI and XhoI, and ligated into  
158 pENTR1a-N3xFLAG (ThermoFisher) to create plasmid pVA85. The complement fragment *cyaB*  
159 ORF was PCR amplified using primers *P<sub>cyaB</sub>*-F-SalI/*P<sub>cyaB</sub>*-R and *cyaB*ORF-F/*cyaB*ORF-R-SalI  
160 with pVA85 as the template and underwent overlap PCR with *P<sub>cyaB</sub>*-F-SalI and *cyaB*ORF-R-SalI.  
161 The complement fragment *cyaB* with SR0623 was amplified using primer pair *P<sub>cyaB</sub>*-F-  
162 SalI/*P<sub>cyaB</sub>*-R and *cyaB*ORF-F/*cyaB*SR0623-R-SalI with pVA85 as the template and underwent  
163 overlap PCR with *P<sub>cyaB</sub>*-F-SalI and *cyaB*SR0623-R-SalI. The modified SR0623 sequence was  
164 engineer and manufactured by GenScript to alter the wobble base pair throughout the sRNA  
165 (Figure S1). The complement fragments were cloned into pVA110 using the SalI restriction sites



166 resulting in pVA112, pVA114, and pVA146, respectively. Chromosomal complement plasmids  
167 were transformed into JH522 generating VA200, VA272, and VA336 (Figure 1 & Table 1).

168 To make a *trans* inducible FLAG tagged *cydB* complement with gentamicin resistance for  
169 overproduction of CyaB, the NdeI site from P<sub>flgB</sub>-*aacCI* was removed by amplifying the P<sub>flgB</sub> and  
170 the *aacCI* cassette with pBSV2G as the template. An overlap PCR was performed on the P<sub>flgB</sub> and  
171 the *aacCI* PCR products, digested, and ligated into pJSB268 digested with AatII and BglII and  
172 blunt ended by Klenow (New England Biolabs) to create plasmid pVA87. To generate a N-  
173 terminally FLAG tagged *cydB* construct (pVA102), *cydB* was amplified from pVA85, digested  
174 with NdeI and HindIII, and ligated into pVA87. JH522 was transformed with pVA102.

175 Electroporation of plasmid DNA into *B. burgdorferi* was done as previously described (D  
176 S Samuels, Mach, and Garon 1994; Hyde, Weening, and Skare 2011). Up to 60µg of DNA was  
177 transformed, recovered overnight, and then selected for by limiting dilution liquid plating in the  
178 appropriate antibiotic and 0.5% phenol red. Transformants were PCR screened for both the allelic  
179 exchange and plasmid content (Labandeira-Rey and Skare 2001).

## 180 **Oxidative stress assays.**

181 Sensitivity to the oxidative stressor H<sub>2</sub>O<sub>2</sub> was determined as previously performed (Hyde  
182 et al. 2009; Ramsey et al. 2017). Briefly, *B. burgdorferi* was grown in BSK-glycerol to mid-log  
183 phase, pelleted at 4,800xg for 10 min at 4°C, washed with 1X phosphate buffered saline (PBS),  
184 and resuspended in modified BSK. 5x10<sup>7</sup> cells were treated with or without H<sub>2</sub>O<sub>2</sub>, and incubated  
185 at 32°C 1% CO<sub>2</sub> for 4 hours in a 1ml volume. Samples were centrifuged at 6,600xg for 10 min at  
186 4°C, resuspended in BSKII with 6% NRS and 0.6% phenol red, serial diluted in 96-well plates,  
187 and incubated for 14 days to assess media color change and survival. Survival was measured from  
188 three biological replicates and the data was converted to logarithmic values before calculating the  
189 averages.

## 190 ***B. burgdorferi* co-cultivation assays.**

191 *B. burgdorferi* was co-incubated with *Ixodes scapularis* embryonic cell line ISE6 and  
192 human neuroglioma cell line H4 (ATCC HTB-148) to evaluate bacterial transcriptional changes  
193 (Schmit, Patton, and Gilmore 2011; J. H. Oliver et al. 1993). ISE6 was maintained in L15C300  
194 supplemented media at 34°C 2% CO<sub>2</sub> in 25 cm<sup>2</sup> flasks seeded with 1x10<sup>7</sup> cells (90% confluency)  
195 for 24 hours (J. D. Oliver et al. 2015). H4 cells were seeded at 90% confluency in Dulbecco's  
196 modified Eagle's medium (DMEM) (Sigma) supplemented with 10% FetalPlex (GeminiBio),  
197 herein designated DMEM+, at 37°C 5% CO<sub>2</sub> for 17 hours. *B. burgdorferi* was grown to mid-log  
198 phase under the same conditions as the cell line, cells were pelleted, washed in PBS, and  
199 resuspended in cell culture media. *B. burgdorferi* were added to the ISE6 and H4 cells at a  
200 multiplicity of infection (MOI) of 10 and 40, respectively (Livengood, Schmit, and Gilmore 2008;  
201 J. H. Oliver et al. 1993). Equivalent numbers of borrelial cells were incubated in cell culture media  
202 alone as a control. At 3, 6, and 24 hours post infection, the cultivation media was collected for  
203 RNA isolation and qRT-PCR analysis.

## 204 **Western analysis.**

205 *B. burgdorferi* were grown in BSK-lite or BSK-glycerol to mid-log phase and cell lysates  
206 were resolved on a 12.5% sodium dodecyl sulfate–polyacrylamide gel electrophoresis (SDS-  
207 PAGE), transferred to a polyvinylidene difluoride (PVDF) membrane, and western  
208 immunoblotting was conducted as previously described (Labandeira-Rey and Skare 2001; Saputra,  
209 Trzeciakowski, and Hyde 2020). Antibody was generated in Sprague-Dawley rats against PlzA as  
210 previously described (D. P. Miller et al. 2016; Izac et al. 2019). The following primary antibody  
211 concentrations were used: mouse anti-flagellum (1:4000) (Affinity Bioreagent), mouse anti-FLAG  
212 (1:4000) (Sigma), rabbit anti-P66 (1:5000) (Cugini et al. 2003), rabbit anti-BosR (1:1000) (Seshu,  
213 Boylan, Hyde, et al. 2004), rabbit anti-DbpA (1:10000) (Guo et al. 1998), rat anti-PlzA (1:1000),  
214 mouse anti-BadR (1:1000) (C. L. Miller, Karna, and Seshu 2013), mouse anti-OspC (1:20000) (He  
215 et al. 2014), mouse-anti-OspA (1:1000) (Capricorn), and mouse anti-Rrp2 (1:1000) (Xiaofeng F.  
216 Yang, Alani, and Norgard 2003). Secondary antibodies were coupled to horseradish peroxidase  
217 (HRP): donkey-anti-rabbit IgG HRP (Amersham), goat-anti-mouse IgG HRP (ThermoFisher), and  
218 rabbit-anti-rat IgG HRP (ThermoFisher). Membranes were imaged with chemiluminescent  
219 substrates to detect antigen-antibody complexes. The immunoblot data presented is representative  
220 of at least three biological replicates.

## 221 **Reverse transcriptase PCR (RT-PCR) and quantitative RT-PCR (qRT-PCR).**

222 *B. burgdorferi* RNA was isolated using hot phenol chloroform extraction as previously  
223 described (Meghan Lybecker et al. 2014; M. Lybecker and Henderson 2018). Total RNA was  
224 treated with DNaseI (Roche) and 1µg was converted to cDNA using Super Script III reverse  
225 transcriptase (+RT) (ThermoFisher) according to the manufacturer’s instructions. A no RT control  
226 was included for each RNA sample. PCR reactions using 500ng cDNA as template were amplified  
227 with AccuStart II PCR Supermix (Quantabio) and imaged on a 1% agarose gel. qRT-PCR reactions  
228 were performed from in vitro cultivated samples with 50ng +RT and –RT cDNA using a ViiA 7  
229 Real-Time PCR system (Applied Biosystems) and Fast SYBR Green Master Mix (Applied  
230 Biosystems) according to the manufacturer’s instructions. *B. burgdorferi* co-cultures transcript  
231 experiments were performed using PerfeCTa SYBR Green FastMix ROX (Quantabio) and  
232 StepOnePlus Real-Time PCR system (Applied Biosystems). *flaB* was used as an internal control  
233 and fold change relative to wild type (WT) calculated using the  $2^{-\Delta\Delta CT}$  method from three to four  
234 biological and technical replicates (Livak and Schmittgen 2001).

## 235 **Northern blots.**

236 RNA was collected from *B. burgdorferi* strains grown in BSK-glycerol to mid-log phase  
237 at 32°C 1%CO<sub>2</sub>. RNA isolation and Northern blot analysis was performed as previously described  
238 (Popitsch et al. 2017). 7-10 µg of RNA was denatured in 2x RNA load dye (Thermofisher) and  
239 heated to 65°C for 15 min, loaded on to a Novex Pre-cast 6% TBE-Urea (8M) polyacrylamide gel  
240 (Thermofisher) in 1X TBE and run for 45-60 min. RNA was electroblotted at room temperature  
241 (10V for 1 h in 0.5X TBE) to HybondXL membranes (Amersham). The membranes were UV  
242 cross-linked (Fisher Scientific UV Crosslinker FB-UVXL-1000) and probed with DNA  
243 oligonucleotide (Table S1) in OligoHyb buffer (Thermofisher) per the manufacturer’s protocol.  
244 Oligonucleotide probes were end-labeled with  $\gamma$ -<sup>32</sup>P ATP (Perkin-Elmer) and T4 PNK (New  
245 England Biolabs) per the manufacturer’s instructions. Unincorporated P<sup>32</sup> was removed using

246 illustra™ MicroSpin™ G50 columns (GE healthcare). Purified probes were heated at 95°C for 5  
247 min before being added to the prehybridizing bots. Blots were hybridized at 42°C rotating  
248 overnight. Membranes were washed 2x 30 min in wash buffer (2x SSC 0.1% SDS). Membranes  
249 were placed on Kodiak BioMax maximum sensitivity (MS) autoradiography film and placed in  
250 the -80°C for 1-10 days depending on the radiation emission given by each membrane. Film was  
251 developed on an AFP imaging developer and scanned using an Epson Expression 10000XL. 5S  
252 rRNA was used as the loading control. The Northern blot data presented is representative of three  
253 biological replicates.

## 254 **Mouse infection studies.**

255 Infection studies were conducted using 6-8 week-old C3H/HeN female mice (Charles  
256 Rivers) with 5A4-NP1, JH522, VA200, VA272, or VA336. Four to five mice were infected with  
257  $10^5$  *B. burgdorferi* by ventral intradermal (ID) injection. Mice were sacrificed and tissues  
258 aseptically collected at 7, 14, and 21 days post infection (dpi) for cultivation or qPCR of borrelial  
259 load. Outgrowth of viable *B. burgdorferi* was determined by dark-field microscopy and the percent  
260 positive tissues was determined. Mice tissues were harvested and DNA was isolated using the  
261 DNeasy Blood & Tissue kit (Qiagen) according to the manufacturer's instructions with the  
262 addition 40µl of 10% collagenase (Sigma) and incubated at 55°C overnight. qPCR reactions were  
263 performed using a StepOnePlus Real-Time PCR system (Applied Biosystems) and PowerUp  
264 SYBR Green Master Mix (Applied Biosystems) according to the manufacturer's instructions.  
265 Standard curves were used to determine the absolute quantification of mouse  $\beta$ -actin and *B.*  
266 *burgdorferi recA*. Technical triplicates were measured for each sample and values are displayed  
267 as copies of *B. burgdorferi recA* per  $10^6$  mouse  $\beta$ -actin.

268 To spatially and temporally track luminescent *B. burgdorferi* during infection, an in vivo  
269 imaging system (IVIS) was used to image mice (IVIS Spectrum, Perkin Elmer). IVIS infection  
270 studies were conducted using 6-8 week-old Balb/c female mice (Charles Rivers) as previously  
271 described (Hyde et al. 2011; Hyde and Skare 2018). Briefly, groups of 5 mice were ID infected  
272 with  $10^5$  *B. burgdorferi* strain ML23 pBBE22*luc*, JH441 pBBE22*luc*, or JH446 pBBE22*luc*. Mice  
273 were intraperitoneally (IP) treated with 5mg of D-luciferin and imaged at 1 hour, 1, 4, 7, 10, 14,  
274 and 21 dpi. One infected mouse of each group did not receive D-luciferin to serve as a negative  
275 control for background luminescence. Images were collected with 1 and 10 min exposures and  
276 bioluminescence from the whole body quantitated. Images in the 600-60,000 counts range were  
277 used to quantitate bioluminescence. Background bioluminescence was subtracted from the treated  
278 samples and averaged. Mice were sacrificed 21 dpi and harvested tissues were used for cultivation  
279 as described above.

## 280 **Animal ethics statement.**

281 Texas A&M University is accredited by the Association for Assessment and Accreditation  
282 of Laboratory Animal Care (AAALAC) indicating their commitment to responsible animal care  
283 and use. All animal experiments were performed in accordance with the Guide for Care and Use  
284 of Laboratory Animals provided by the National Institute of Health (NIH) and the Guidelines of  
285 the Approval for Animal Procedures provided by the Institutional Animal Care and Use Committee  
286 (IACUC) at Texas A&M University.



287 **Statistical Analyses.**

288 Statistical analysis was performed using GraphPad Prism (GraphPad Software, Inc, La Jolla, CA).  
289 The statistical analysis used is listed in the figure legends. Significance was determined by p-values  
290 equal to or less than 0.05.

## 291 **Results.**

### 292 **Construction of the *cyaB* and SR0623 mutant and complement strains.**

293 To investigate *B. burgdorferi cyaB*, we generated a deletion of *bb0723* by replacing the  
294 ORF with the  $P_{flgB}$ -*aadA* antibiotic cassette in 5A4-NP1 (WT) resulting in strain JH522 (Figure 1  
295 & Table 1) (Kawabata, Norris, and Watanabe 2004). The 3' end of *cyaB* overlaps with the 3' end  
296 of its neighboring gene *bb0722* by 26 base pairs, which was not deleted in the *cyaB*<sup>-</sup> strain. In  
297 addition, the sRNA SR0623 is encoded within the 3' end of *cyaB* (95 base pairs) and with *bb0722*  
298 (88 base pairs) (Popitsch et al. 2017). SR0623 could either be a result of RNA processing of the  
299 *cyaB* mRNA or it could have its own promoter within *cyaB*. Adams et al. globally identified the 5'  
300 end transcriptome and identified putative transcriptional start sites (TSSs) in *B. burgdorferi*  
301 (Adams et al. 2017). A putative TSS was not identified within the *cyaB* ORF suggesting SR0623  
302 is synthesized via *cyaB* mRNA processing. To distinguish the functional contribution of CyaB  
303 from the sRNA SR0623, we made three chromosomal complements of *cyaB* using its native  
304 promoter and  $P_{flgB}$ -*aacC1* antibiotic cassette but included different forms of SR0623 (Figure 1).  
305 VA200 encodes *cyaB* and a truncated SR0623, designated *c-cyaB*. A *cyaB* and full length SR0623  
306 is restored in VA272 and named *c-cyaB*-SR0623. A site-directed mutant of SR0623 was generated  
307 by altering every third base-pair in the wobble position to disrupt the sRNA primary and secondary  
308 structure while maintaining the amino acid sequence of CyaB in complement strain VA336,  
309 referred to as *c-cyaB*-SR0623w. For independent verification of the *cyaB* phenotype, deletion and  
310 complement strains were also generated in the ML23 background strain. The *cyaB*<sup>-</sup> strain, JH441,  
311 was chromosomally complemented with *cyaB* and SR0623, generating *c-cyaB*-SR0623 strain  
312 JH446. JH441 and JH446 were transformed with pBBE22*luc* for in vivo imaging studies (Hyde et  
313 al. 2011; Hyde and Skare 2018).

314 The absence of polar effects on the neighboring genes and confirmation of *cyaB* expression  
315 in our strains was verified qualitatively by RT-PCR (Figure 2A). As expected, *cyaB* transcript was  
316 detected in WT, *c-cyaB*, *c-cyaB*-SR0623, and *c-cyaB*-SR0623w with a notable absence in the  
317 *cyaB*<sup>-</sup> strain. Expression of *bb0722* and *bb0724* was observed in all strains. To evaluate the  
318 expression of *cyaB* and SR0623 northern blots were performed with probes designed to hybridize  
319 to the 5' end of SR0623 (Figure 2B). The *cyaB* transcript (484bp) and SR0623 (~158 bp) are  
320 present in the WT strain and absent in the *cyaB*<sup>-</sup> strains, as anticipated. *c-cyaB* produces a *cyaB*  
321 transcript and lacks SR0623. *c-cyaB*-SR0623 expresses more *cyaB* and SR0623 than WT strain,  
322 which may alter the levels of CyaB protein and perhaps the function of SR0623. *c-cyaB*-SR0623w  
323 strain does not have a detectable *cyaB* or SR0623 because the engineered wobble-base mutations  
324 prevent the probe from binding. Together, this data suggests that steady-state levels of the *cyaB*  
325 mRNA are dependent on its 3' UTR, which also encodes SR0623.

### 326 ***cyaB* does not contribute to the oxidative stress response.**

327 *B. burgdorferi* is able to sense and combat oxidative stress by mechanisms that are not fully  
328 understood (Boylan, Posey, and Gherardini 2003; Boylan et al. 2008; Seshu, Boylan, Hyde, et al.  
329 2004; Boylan et al. 2006; Hyde et al. 2009; Ramsey et al. 2017). A Tn-seq screen by Ramsey et  
330 al. found *B. burgdorferi* disrupted in *cyaB* had a two-fold decrease in fitness after exposure to  
331 H<sub>2</sub>O<sub>2</sub>, therefore we sought out to determine if the AC contributed to the oxidative stress response  
332 similar to other pathogens (Ramsey et al. 2017). *B. burgdorferi* strains, WT and *cyaB*<sup>-</sup>, were

333 exposed to increasing concentrations of H<sub>2</sub>O<sub>2</sub>, then serially diluted to determine the survival  
334 percentage. We found that *cydB*<sup>-</sup> strain survival was comparable to the WT strain 5A4-NP1 (Figure  
335 3). There are several reasons our *cydB*<sup>-</sup> phenotype does not correlate with Ramsey et al. *cydB* Tn-  
336 seq phenotype. Ramsey et al. exposed a pool of transposon disruption mutants to an oxidative  
337 stressor and measured fitness of the population whereas we are examining a single strain and its  
338 survival. Another reason for the difference in findings may be the *B. burgdorferi* growth condition  
339 prior to conducting the assay. We grew our cells to mid-log phase in BSK-lite lacking glucose and  
340 supplemented with glycerol rather than complete BSKII. It was important for us to limit glucose  
341 in the media because in some bacteria, such as *Vibrio cholerae* and *E. coli*, the presence of glucose  
342 has been shown to alter AC activity and therefore cAMP production (Liang et al. 2007; Gstrein-  
343 Reider and Schweiger 1982). Previous studies used BSK-glycerol to grow *B. burgdorferi* when  
344 investigation of secondary metabolite c-di-GMP was evaluated (He et al. 2011). We found that  
345 absence or addition of glycerol to the BSK-lite did not influence *B. burgdorferi* growth or alter  
346 mammalian virulence factor production (Figure S2).

#### 347 ***cydB* influences borrelial virulence determinants.**

348 Loss of an AC results in attenuation of virulence factors in many different bacteria, such  
349 as *Pseudomonas aeruginosa* and *Salmonella typhimurium*, therefore we were interested in  
350 examining the influence of *cydB* on important *B. burgdorferi* virulence determinants (R. S. Smith,  
351 Wolfgang, and Lory 2004; Curtiss and Kelly 1987). Transcript levels were measured for multiple  
352 *B. burgdorferi* targets that included genes important for regulation in the tick vector (*hkI*, *rrpI*,  
353 *plzA*, and *ospA*) and mammalian virulence genes (*badR*, *bosR*, *rpoS*, *ospC*, *dbpA*, and *bbk32*)  
354 (Figure 4). No changes were observed for genes shown to be operative in the arthropod-borne  
355 phase of infection, which may be due to secondary messenger c-di-GMP being involved in the  
356 vector (Figure 4A) (Rogers et al. 2009; He et al. 2014). Surprisingly, only *ospC* transcription was  
357 found to be statistically significantly reduced 14-fold in the *cydB*<sup>-</sup> strain compared to WT (Figure  
358 4B). The expression of *ospC* was fully and partially restored to WT level in the *c-cydB*-SR0623w  
359 and *c-cydB* strains, respectively. The *c-cydB*-SR0623 had an *ospC* transcript level similar to the  
360 *cydB*<sup>-</sup> strain. This transcriptional data indicates that *cydB* may be able to influence *B. burgdorferi*  
361 mammalian virulence determinant expression.

362 cAMP plays an important role in post-transcriptional regulation in many bacteria, for  
363 example, in *S. enterica* cAMP-CRP post-transcriptionally regulates transcriptional regulator Hild  
364 resulting in reduced virulence factor production (Mouali et al. 2018). Our next step was to evaluate  
365 the impact of *cydB* on the protein production of *B. burgdorferi* virulence determinants. We used  
366 immunoblotting to examine the protein levels of several borrelial components associated with the  
367 tick and mammalian pathways (Figure 5). Virulence determinants PlzA and OspA, important for  
368 survival in the tick, and mammalian virulence determinants Rrp2 and BadR, were not altered in  
369 the *cydB*<sup>-</sup> strain compared to WT. *bosR* undergoes transcriptional and post-transcriptional  
370 regulation in response to pH or metals and CO<sub>2</sub>, respectively, by unknown mechanisms, therefore  
371 we considered that BosR may also be post-transcriptionally regulated by cAMP (Hyde,  
372 Trzeciakowski, and Skare 2007; Saputra, Trzeciakowski, and Hyde 2020). We found that the *cydB*<sup>-</sup>  
373 strain produced less BosR relative to WT demonstrating another condition where BosR is post-  
374 transcriptionally regulated given there was no difference observed in *bosR* expression (Figure 4 &  
375 5). Strains *c-cydB* and *c-cydB*-SR0623w restored BosR protein production back to approximate  
376 WT levels. However, the *c-cydB*-SR0623 complement had BosR protein levels comparable to the

377 *cyaB*<sup>-</sup> strain. The lack of complementation of *c-cyaB*-SR0623 may be in part due to different  
378 expression levels of *cyaB* and SR0623 observed by Northern analysis (Figure 2B). DbpA and  
379 OspC protein production followed the same pattern as BosR. The different phenotypes of  
380 complement *cyaB* strains suggests a possible regulation of *cyaB* by SR0623. Collectively, these  
381 results would indicate that CyaB or cAMP, directly or indirectly, post-transcriptionally activates  
382 both BosR and DbpA. This data confirms that the changes observed in the *ospC* transcript  
383 influence the OspC protein level. It remains unclear if OspC and DbpA are being regulated by  
384 *cyaB* independently or through BosR regulation of *rpoS*.

### 385 ***cyaB* expression is induced by host cell interaction.**

386 *B. burgdorferi* gene expression is highly responsive to changes in various environmental  
387 cues and may also impact *cyaB* expression. Under BSK cultivation with shifts in temperature, pH,  
388 and CO<sub>2</sub> we observed no significant changes in *cyaB* transcript (data not shown). To investigate if  
389 expression of *cyaB* is influenced by tick or mammalian cellular factors, we co-cultured *B.*  
390 *burgdorferi* strain 5A4-NP1 for 24 hours with the tick neuroglial cell line ISE6 or the mammalian  
391 neuroglial cell line H4 and harvested bacteria in the cell culture media (Figure 6) (Livengood,  
392 Schmit, and Gilmore 2008; Oliver et al. 1993). *cyaB* expression was not significantly changed at  
393 the time points tested in the tick neuroglial cell line ISE6 relative to *B. burgdorferi* incubated in  
394 cell culture media alone. Mammalian neuroglial cell line H4 significantly induced the borrelial  
395 *cyaB* expression after 24-hour co-incubation. These results indicate that *cyaB* expression is  
396 influenced by cellular factor(s) unique to mammalian cell lines and not by in vitro grown tick cells  
397 or during in vitro cultivation in BSKII media.

### 398 **The absence *cyaB* results in attenuated infection.**

399 Given that deletion of *cyaB* resulted in altered mammalian virulence determinants, we  
400 hypothesized that infecting mice with the *cyaB*<sup>-</sup> strain would alter infectivity. C3H/HeN mice were  
401 intradermally infected with the WT, *cyaB*<sup>-</sup> strain, or complement strains. Tissues were collected at  
402 7, 14, and 21 days post-infection (dpi) for both qualitative outgrowth and quantitative molecular  
403 analysis of infection. Cultivation data shows that all harvested tissues from mice infected with the  
404 WT strain were positive for *B. burgdorferi* by day 14, whereas, half the tissues for the *cyaB*<sup>-</sup> strain  
405 did not have bacterial outgrowth (Table 2). Unfortunately, none of the three complement strains  
406 were able to restore infectivity to WT levels. This was surprising given that the qRT-PCR,  
407 Northern, and Western data show that the *c-cyaB* and *c-cyaB*-SR0623w strains restore the *cyaB* in  
408 vitro deletion phenotypes. *B. burgdorferi* burden of individual infected tissues was analyzed by  
409 qPCR to determine the bacterial burden. The *cyaB*<sup>-</sup> strain was significantly lower at 7 dpi in lymph  
410 nodes, bladders, and skin flanks adjacent to the inoculum site. The ears, a distal skin colonization,  
411 and joints had less *B. burgdorferi* at 14 and 21dpi, respectively, when infected with the *cyaB*<sup>-</sup> strain  
412 (Figure 7). The *cyaB* complements had borrelial loads similar to the *cyaB*<sup>-</sup> strain. Taken together  
413 this data would indicate that *cyaB* plays a role in mammalian infectivity.

414 To independently evaluate the influence of *cyaB* on infectivity, we generated a *cyaB*  
415 deletion in the ML23 background that is used to track bioluminescent imaging during murine  
416 infection as a way to evaluate temporal and spatial dissemination (Hyde et al. 2011, 32; Hyde and  
417 Skare 2018). The parent (ML23), *cyaB*<sup>-</sup> (JH441), and *c-cyaB*-SR0623 complement (JH446) strains  
418 had pBBE22*luc* introduced into them were tested for disseminated infectivity using light emission

419 as a reporter for live *B. burgdorferi* (Hyde et al. 2011). Western analysis of the aforementioned  
420 showed less protein production of BosR, DbpA, and OspC in the *cyaB*<sup>-</sup> strain as was observed in  
421 the 5A4-NP1 background mutant (Figure S3). Balb/c mice were then infected with the *B.*  
422 *burgdorferi* strains and in vivo imaged at 0, 1, 4, 7, 10, 14, and 21 dpi. The bioluminescent tracking  
423 shows the bacteria being localized to the site of injection early at day 0 and then progressing to  
424 distal tissues throughout the mouse by day 21 (Figure 8A). At 7 dpi, the peak of infection, the  
425 parent strain produces three times more light than the *cyaB*<sup>-</sup> strain; however, the *c-cyaB*-SR0623  
426 complement strain is not able to restore the light emission observed for the parent strain (Figure  
427 8B). The parent strain disseminates to distal tissues through day 21. This dissemination is not  
428 observed in the *cyaB*<sup>-</sup> or *c-cyaB*-SR0623 strains, which instead stay localized near the site of  
429 injection. After imaging on day 21, mice tissues, lymph nodes, skin flanks, ears, and joints, were  
430 harvested and used for cultivation. We found a slight reduction in the number of infected tissues  
431 in *cyaB*<sup>-</sup> strain and *c-cyaB*-SR0623 *B. burgdorferi* (Figure 8C). It is interesting to note that the ears  
432 of the *cyaB*<sup>-</sup> strain and *c-cyaB*-SR0623 strain infected mice were negative for *B. burgdorferi*,  
433 suggesting the genetic modifications may alter tissue dissemination. This independently validates  
434 the infectivity data in the 5A4-NP1 background and, taken together, despite the issues with  
435 incomplete complementation, supports the finding that *cyaB* is important for murine infection.



## 436 Discussion.

437 *B. burgdorferi* gene regulation is dynamic and highly responsive to changes in  
438 environmental conditions to support the necessary adaptation for traversing between the tick vector  
439 and mammalian host (Radolf et al. 2012; D. Scott Samuels and Samuels 2016). The mechanisms  
440 used by *B. burgdorferi* to directly sense environmental conditions and relay that information to  
441 alter gene regulation are poorly understood. We hypothesize that *B. burgdorferi* uses an AC (*cyaB*,  
442 *bb0723*) and possibly cAMP for the response to environmental cues and to regulate virulence  
443 determinants important for mammalian infection. ACs cyclize ATP producing cAMP which  
444 functions as a secondary messenger in eukaryotes and prokaryotes (Stanley McKnight 1991;  
445 Botsford and Harman 1992; Kamenetsky et al. 2006; McDonough and Rodriguez 2011). In  
446 bacteria, ACs and/or cAMP are responsive to a variety of environmental changes, such as carbon  
447 starvation, CO<sub>2</sub> levels, bicarbonate, osmolarity, and pH (Hoffmaster and Koehler 1997; Franchini,  
448 Ihssen, and Egli 2015; Cann et al. 2003; Rebollo-Ramirez and Larrouy-Maumus 2019). cAMP is  
449 used by numerous bacterial pathogens to alter both the host and pathogen at the level of post-  
450 transcriptional regulation for signal reception, signal transduction, AC activity, virulence gene  
451 regulation, resistance to oxidative stress, and persistence (Molina-Quiroz et al. 2018). It is well  
452 documented that *B. burgdorferi* utilizes cyclic dinucleotides during the tick and mammalian stages  
453 of pathogenesis to modulate the necessary gene regulation for response to environmental pressures,  
454 therefore it is plausible it also relies on cyclic nucleotides for regulation (Savage et al. 2015; Ye et  
455 al. 2014; Melissa J. Caimano et al. 2015; He et al. 2011; Zhang et al. 2018; Rogers et al. 2009). It  
456 is important to understand the strategies employed by *B. burgdorferi* to adapt to changing  
457 environmental conditions to evaluate borrelial pathogenesis in the context of mammalian infection.

458 In this study, a genetic approach was used to evaluate the borrelial *cyaB* contribution to the  
459 regulation of virulence determinants and mammalian infectivity. Borrelial *cyaB* has been  
460 annotated as a class IV AC, which is the smallest of the classes and has been previously crystalized  
461 in *Yersinia pestis* (Casjens et al. 2000; Khajanchi et al. 2016). *cyaB* is encoded on the positive  
462 strand and overlaps with *bb0722* encoded on the opposite strand. Deletion mutants of *cyaB* in two  
463 independent *B. burgdorferi* strains, 5A4-NP1 and ML23, were generated that also disrupted  
464 SR0623. Three unique complement strains, *cyaB* only, *cyaB* with SR0623, and *cyaB* with a  
465 mutagenized SR0623, were generated to clarify the contribution of *cyaB*, SR0623, and the  
466 combination of *cyaB* and SR0623 to our readouts of borrelial infectivity (Figure 1). The complete  
467 deletion of the *cyaB* ORF also truncates SR0623 and results in a reduction in the production of  
468 important mammalian virulence determinants BosR, OspC, and DbpA, while tick virulence  
469 determinants are unchanged (Figure 5). Interestingly, only *ospC* was transcriptionally down  
470 regulated in the *cyaB* deletion strains (Figure 4). Complement strains encoding the *cyaB* ORF with  
471 a truncated or mutagenized SR0623 were able to restore protein production to WT levels,  
472 suggesting the sRNA is not necessary for regulation of OspC, BosR or DbpA. Unexpectedly, the  
473 complement with *cyaB* and a complete SR0623 produced only slightly higher levels of BosR,  
474 OspC, and DbpA than the mutant. Northern analysis demonstrated higher levels of *cyaB* transcript  
475 and SR0623 in the *cyaB*-SR0623 complement strain relative to WT, which may explain the partial  
476 complementation phenotype (Figure 2). This data demonstrates *cyaB* contributes to transcriptional  
477 and post-transcriptional regulation of selected *B. burgdorferi* genes. Furthermore, *cyaB*, and  
478 possibly cAMP, are involved in regulation of factors specific for borrelial pathogenicity.

479 *B. burgdorferi* is greatly influenced by environmental conditions and may use *cyaB* as an  
480 environmental sensor (Radolf et al. 2012; D. Scott Samuels and Samuels 2016). We examined the  
481 *cyaB* mutant and complement strains under a variety of growth conditions by imposing oxidative  
482 stress, as well as shifting temperature, pH, and CO<sub>2</sub>, and found no phenotypic differences (Figure  
483 3 & data not shown). Knowing that different carbon sources can alter cyclase activity and  
484 production of cyclic nucleotide and di-nucleotides media that replaced glucose with glycerol was  
485 used to examine regulation of borrelial virulence factors (Liu et al. 2020; Peterkofsky and Gazdar  
486 1974). Differences in borrelial virulence determinant protein production were more pronounced in  
487 BSK-lite, independent of glycerol supplementation, relative to conventional BSKII (Figure S2 &  
488 data not shown). Further investigation indicated BSK-lite with or without glycerol resulted in the  
489 same pattern of protein production signifying glucose as the carbon source was responsible for the  
490 differential response and demonstrating borrelial catabolite repression.

491 *B. burgdorferi* is highly responsive to host specific signals and it is possible *cyaB* is  
492 involved in signaling for mammalian adaptation. We evaluated *cyaB* expression when co-cultured  
493 with vector or mammalian cells to mimic interactions during the pathogenic cycle. The expression  
494 of *cyaB* is induced when co-cultured with mammalian H4 neuroglial cells, but unchanged with  
495 tick ISE6 cells (Figure 6). Due to *cyaB* induced expression in the presence of mammalian cells,  
496 we also evaluated the contribution of *cyaB* to mammalian infection. During mouse infection the  
497 *cyaB* mutant strains had lower borrelial colonization, particularly during early time points (Figure  
498 7 & 8). In later infection disseminated tissues, notably the ear and tibiotarsal joint, also had lower  
499 *B. burgdorferi* load relative to the infectious parent strain. Unfortunately, the complement strains  
500 that restored virulence determinant production in vitro did not colonize tissues at the same level as  
501 parental *B. burgdorferi*. The data is strengthened by similar results in two independent borrelial  
502 strains. Infectivity studies demonstrated that the absence of *cyaB* results in inhibited dissemination  
503 and attenuated infection. Together, this suggests *cyaB* contributes to mammalian colonization and  
504 supports this stage of the life cycle.

505 Khajanchi et al. evaluated the functional ability of *cyaB* and contribution to mouse  
506 infection using the *cyaB* transposon mutants (Khajanchi et al. 2016). This study showed  
507 recombinant CyaB produced cAMP in a temperature dependent manner but was not evaluated  
508 directly in *B. burgdorferi*. Our attempts to measure cAMP production during cultivation of *B.*  
509 *burgdorferi* have been unsuccessful likely due to the low-level expression and production of *cyaB*  
510 under these conditions. Transposon mutants with insertions in *cyaB* (insertion ratios 0.02 and 0.93)  
511 did not demonstrate an infectivity phenotype by needle inoculation or tick transmission (Khajanchi  
512 et al. 2016). Infectivity was qualitatively evaluated by borrelial outgrowth from infected tissues  
513 following a 28-day infection in which all tissues were positive for the presence of the bacteria. Our  
514 findings observed *B. burgdorferi* in most tissues at the last time point with the exception of the  
515 ears that was not assessed in the prior work. We quantitated the borrelial load of the whole mouse  
516 and individual tissues by bioluminescent imaging and qPCR, respectively. We found that overall  
517 borrelial load was reduced that were specifically lower in the skin flank and bladders during early  
518 infection, but remained low in the ear and the tibiotarsal joints. We have also investigated the  
519 involvement of SR0623 that was unknown at the time of previous studies. This indicates that *cyaB*  
520 may contribute to pathogenesis during earlier borrelial infection that can be overcome by  
521 compensatory, but unknown genes, to be able to reach a fully disseminated infection. Our study  
522 further pursued the role of borrelial ACs by investigating the regulatory effect of *cyaB* on known  
523 borrelial virulence determinants. While this study focused on a few targets it is likely that *cyaB*

524 and cAMP have a broader impact on transcriptional and post-transcriptional regulation in *B.*  
525 *burgdorferi*.

526 Another important aspect of bacterial post-transcriptional regulation is the contribution by  
527 sRNAs. Over a thousand sRNAs were recently identified in *B. burgdorferi* (Popitsch et al. 2017),  
528 but few have been characterize. SR0623 is an intragenic sRNA that is encoded on the negative  
529 strand within the 3' end of *cyaB* (*bb0723*) and overlaps with the hypothetical gene *bb0722* (Figure  
530 1). SR0623 is predicted to be transcribed with *cyaB* and processed, which could result in a  
531 truncated *cyaB* transcript. Intragenic sRNAs in other bacteria regulate the genes they are encoded  
532 within, therefore SR0623 may regulate *cyaB* and/or *bb0722*. In addition, intragenic RNAs have  
533 been co-immunoprecipitated with RNA binding proteins and other mRNAs and sRNAs, indicating  
534 they may have multiple targets beside the genes they are encoded within (Melamed et al. 2020;  
535 Iosub et al. 2020; Melamed et al. 2016; Bilusic et al. 2014). In the complement with truncated  
536 SR0623 there is lower steady-state levels of *cyaB* compared to the WT, indicating SR0623 and/or  
537 the 3' end of the *cyaB* transcript are important for regulating *cyaB* steady-state transcript levels.  
538 Furthermore, in the *cyaB* full-length SR0623 compliment there is higher steady state levels of *cyaB*  
539 and SR0623. Interestingly, both ACs and sRNAs function in post-transcriptional regulation.  
540 Finally, we also cannot rule out that our observed phenotype and challenges with complementation  
541 may be in part attributed to SR0623 regulation of *bb0722* or the intra RNA SR0622 encoded with  
542 in it.

543 The current study does not address the direct detection of cAMP from cultivated *B.*  
544 *burgdorferi*. Future studies will investigate the environmental conditions in vitro and in vivo that  
545 promotes the production of cAMP and determine if it correlates with expression or production of  
546 *cyaB*. Here in, we narrowly focused on the regulation of known tick and mammalian virulence  
547 determinant, but it is likely that *cyaB* and cAMP have a broader post-transcription regulatory  
548 impact on *B. burgdorferi*. The various strategies used to complement *cyaB* and/or SR0623 resulted  
549 in restoration phenotypes under in vitro conditions, but unfortunately were not able to completely  
550 restore the WT phenotype during mouse infection. This could be due to altered processing or  
551 stability of SR0623 and/or *cyaB* in the complement strains, which may impact the AC activity  
552 specifically induced under host adapted conditions. Our study is not the first to have difficulty  
553 complementing a borrelial gene or sRNA and represents a broader challenge in the field of  
554 bacterial pathogenesis. Further study is required to distinguish the function of intergenic sRNA  
555 from the gene it is encoded within to fully understand the complex regulation of *B. burgdorferi*.

556 In this study, we identified the ability of *cyaB* to contribute to the regulation of mammalian  
557 virulence determinants and infectivity in mice. This phenotype is presumably due to the production  
558 of cAMP and its impact on post-transcriptional regulation in *B. burgdorferi*. It also shed light on  
559 the complexities and possible contribution of sRNA to borrelial regulation in which the distinct  
560 responses are observed under cultivation conditions and/or during infection. It has become clear  
561 that *B. burgdorferi* utilizes post-transcriptional regulation to support pathogenesis and to provide  
562 a dynamic means to adapt to the various milieus that Lyme spirochetes move between during its  
563 complex lifecycle.

564 **Figure legends.**

565 **Figure 1. Schematic of the *cyaB* mutant and *trans*-complement strains.** The *cyaB* deletion  
566 strain JH522 was generated through the insertion of an *aadA* antibiotic cassette to disrupt *cyaB*  
567 (*bb0723*) while keeping *bb0722* intact. Chromosomal *cyaB* complementation strains were made  
568 through the introduction of an *aacCI* antibiotic cassette. Complement strain VA200 contains the  
569 *cyaB* ORF while truncating the sRNA SR0623, strain VA272 contains both the *cyaB* ORF and  
570 SR0623, and strain VA336 contains the *cyaB* ORF and a wobble mutation of SR0623. ORFs are  
571 indicated by arrows and sRNAs by wavy lines.

572 **Figure 2. Verification of strains generated in this study.** (A) Deletion of *cyaB* does not abolish  
573 transcription of neighboring genes *bb0722* or *bb0724*. RT-PCR was used to verify the presence or  
574 absence of transcripts in the indicated *B. burgdorferi* strains. RNA was isolated and used to  
575 generate cDNA as describe in the methods. The +/- symbols indicates if the cDNA reaction with  
576 or without reverse transcriptase. PCR reactions included cDNA and primers for *cyaB* (*bb0723*),  
577 *bb0722*, or *bb0724*. (B) sRNA-sequencing results are displayed in the coverage map (Popitsch et  
578 al. 2017). The + strand is shown in green and the – strand in blue. Northern blot analyses of total  
579 RNA fractionated on a 6% denaturing polyacrylamide gel, blotted to a nylon membrane and  
580 hybridized with radioactive oligonucleotides. The black line represents the location of the  
581 oligonucleotide probes. The genomic context is indicated below the coverage plot. The predicted  
582 transcripts are denoted and marked with the appropriate band in the Northern blot. Northern blots  
583 are representative of three biological replicates. The following abbreviations are used to indicate  
584 strains: WT (P), *cyaB*<sup>-</sup> (M), *c-cyaB* (C), *c-cyaB*-SR0623 (S), *c-cyaB*-SR0623w (W).

585 **Figure 3. *cyaB* does not contribute to H<sub>2</sub>O<sub>2</sub> resistance.** WT and *cyaB*<sup>-</sup> strains were grown in  
586 BSK-glycerol to mid-log phase at 32°C 1% CO<sub>2</sub>, exposed to H<sub>2</sub>O<sub>2</sub> in modified BSK media for 4  
587 hours at 32°C 1% CO<sub>2</sub>, and serial diluted for outgrowth to determine survival. Shown is the  
588 average and standard error of three independent biological replicates.

589 **Figure 4. Deletion of *cyaB* reduces *ospC* expression.** *B. burgdorferi* was grown in BSK-glycerol  
590 to mid-logarithmic phase at 32°C 1% CO<sub>2</sub> for qRT-PCR analysis to investigate the relative  
591 transcript levels of virulence determinants for the (A) tick and (B) mammalian cycle. *flaB* was  
592 used as an endogenous control and fold changes are compared to WT. Shown are the averages and  
593 standard error of three biological replicates. Statistical analysis was performed using one-way  
594 ANOVA with Dunnett correction relative to WT, \*\*\* p<0.001.

595 **Figure 5. Deletion of *cyaB* reduces protein production of BosR, OspC, and DbpA.** *B.*  
596 *burgdorferi* was grown in BSK-glycerol to mid-logarithmic phase at 32°C 1% CO<sub>2</sub>. Protein was  
597 harvested and resolved on a SDS-PAGE with approximately 4x10<sup>7</sup> *B. burgdorferi* in each lane.  
598 Immunoblots were prepared using the depicted anti-serum. FlaB was used as a loading control.  
599 Displayed is representative of three independent replicates. The following abbreviations are used  
600 to indicate strains: WT (P), *cyaB*<sup>-</sup> (M), *c-cyaB* (C), *c-cyaB*-SR0623 (S), *c-cyaB*-SR0623w (W).

601 **Figure 6. *cyaB* expression is induced with mammalian H4 cell co-culture.** *B. burgdorferi* was  
602 co-cultured with ISE6 tick cells or H4 mammalian cells. qRT-PCR was performed on samples  
603 collected at 3, 6, and 24 hours co-incubation. *flaB* was used as an endogenous control. Shown is



604 the average and standard error of four biological replicates. Statistical analysis was done using  
605 Two-way ANOVA with Tukey correction, \*p-value<0.05.

606 **Figure 7. Borrelial burden and tissue dissemination is reduced in mouse tissues infected with**  
607 **the *cyaB* mutant.** C3H/HeN mice were infected with  $10^5$  *B. burgdorferi* and tissues were  
608 harvested at 7, 14, and 21 dpi. qPCR was performed on (A) Ears, (B) Skin Flanks, (C) Joints, and  
609 (D) Bladders to determine the number of borrelial genomes (*recA*) per  $10^6$  copies of mouse  $\beta$ -actin.  
610 Individual data points with at least n of 4 with lines representing average and standard error.  
611 Statistical analysis was done using Two-way ANOVA with Dunnett correction relative to WT,  
612 \*\*p-value<0.01, \*\*\*p-value<0.001, \*\*\*\*p-value<0.0001.

613 **Figure 8. Bioluminescent *cyaB*<sup>-</sup> has attenuated infection and dissemination.** (A)  
614 Bioluminescent *B. burgdorferi* is temporal and spatial tracked during infection of Balb/c mice with  
615  $10^5$  WT, *cyaB*<sup>-</sup>, or *c-cyaB*-SR0623. Mice were imaged at 1 hour and 1, 4, 7, 10, 14 and 21 dpi. The  
616 mouse in the first position of the image, indicated by (-), did not receive D-luciferin to serve as a  
617 background control. n of 5 for each infection group. (B) The bioluminescence of four mice was  
618 quantitated and averaged. Statistical analysis was performed using Two-way ANOVA with Tukey  
619 correction relative to WT, \*\*\*\*p-value<0.0001. (C) The percentage of tissues positive for *B.*  
620 *burgdorferi* at 21 dpi, grown in BSKII+NRS.

621 **Supplemental Figure 1. SR0623 wobble mutation sequence.** Site directed mutagenesis of every  
622 third base pair of the sRNA SR0623 sequence is denoted by underlining. The *cyaB* ORF stop  
623 codon is indicated by an asterisk. The stop codon for the overlapping *bb0722* ORF is outlined by  
624 a box. The numbers indicate the distance from the *cyaB* ORF start codon.

625 **Supplemental Figure 2. Glycerol does not alter *B. burgdorferi* virulence factor production.**  
626 The *B. burgdorferi* strains 5A4-NP1 (WT) and JH522 (*cyaB*<sup>-</sup>) were grown in BSK-lite with or  
627 without 0.6% glycerol to mid-logarithmic phase at 32°C 1% CO<sub>2</sub>. Protein was harvested and  
628 resolved on a SDS-PAGE with each lane containing approximately  $4 \times 10^7$  *B. burgdorferi*.  
629 Immunoblotting was carried out using the anti-serum depicted. FlaB was used as a loading control.  
630 Representative of at least three independent replicates.

631 **Supplemental Figure 3. Mammalian virulence factors production in bioluminescent *cyaB***  
632 **mutant.** *B. burgdorferi* ML23 strains were grown in BSK-glycerol to mid-log phase at 32°C 1%  
633 CO<sub>2</sub>. Protein was harvested and resolved on a SDS-PAGE with each lane containing  
634 approximately  $4 \times 10^7$  *B. burgdorferi*. Immunoblots were probed using the anti-serum depicted.  
635 FlaB was used as a loading control. Representative of at least three individual replicates. The  
636 following abbreviations are used to indicate strains: ML23 pBBE22*luc* (P), JH441 pBBE22*luc*  
637 (M), JH446 pBBE22*luc* (C).



638 **Table 1.** Strains and plasmids used in this study.

| Strain                               | Genotype                                                                                                                                                                                                     | Reference                             |
|--------------------------------------|--------------------------------------------------------------------------------------------------------------------------------------------------------------------------------------------------------------|---------------------------------------|
| <b><i>B. burgdorferi</i> strains</b> |                                                                                                                                                                                                              |                                       |
| 5A4-NP1                              | Clonal infectious isolate of 5A4 with <i>bbe02</i> disrupted with $P_{flgB}$ - <i>kan</i> , lacking <i>cp9</i>                                                                                               | (Kawabata, Norris, and Watanabe 2004) |
| JH522                                | 5A4-NP1 <i>bb0723</i> :: $Sm^R$                                                                                                                                                                              | This study                            |
| VA200                                | JH522 $P_{cyaB512}$ -FLAG- <i>cyaB</i> :: $Gent^R$                                                                                                                                                           | This study                            |
| VA272                                | JH522 $P_{cyaB512}$ -FLAG- <i>cyaB</i> -SR0623:: $Gent^R$                                                                                                                                                    | This study                            |
| VA336                                | JH522 $P_{cyaB512}$ -FLAG- <i>cyaB</i> -SR0623wobble:: $Gent^R$                                                                                                                                              | This study                            |
| JH522 pVA102                         | JH522 carrying pVA87:: $P_{pQE30}$ -FLAG- <i>cyaB</i> , $Gent^R$                                                                                                                                             | This study                            |
| ML23                                 | Clonal isolate of strain B31 lacking <i>lp25</i> and <i>cp9</i>                                                                                                                                              | (Labandeira-Rey and Skare 2001)       |
| JH441 pBBE22 <i>luc</i>              | ML23 <i>bb0723</i> :: $Sm^R$ carrying constitutive bioluminescence shuttle vector                                                                                                                            | This study                            |
| JH446 pBBE22 <i>luc</i>              | JH441 $P_{cyaB336}$ - <i>cyaB</i> -SR0623:: $Gent^R$ carrying constitutive bioluminescence shuttle vector                                                                                                    | This study                            |
| <b><i>E. coli</i> strains</b>        |                                                                                                                                                                                                              |                                       |
| NEB 10 $\beta$                       | <i>araD139</i> $\Delta$ ( <i>ara, leu</i> )7697 <i>fhuA lacX74 galK16 galE15 mcrA</i> $\phi$ 80d( <i>lacZ</i> $\Delta$ M15) <i>recA1 relA1 endA1 nupG rpsL rph spoT1</i> $\Delta$ ( <i>mrrhsdRMS-mcrBC</i> ) | New England Biolabs                   |
| <b>Plasmids</b>                      |                                                                                                                                                                                                              |                                       |
| pCR8                                 | Intermediate for TOPO cloning, $Spec^R$                                                                                                                                                                      | ThermoFisher                          |
| pENTR1a-N3xFLAG                      | $Kan^R$                                                                                                                                                                                                      | ThermoFisher                          |
| pJH333                               | Allelic exchange vector, $Spec^R$ and $Gent^R$                                                                                                                                                               | This study                            |
| pVA110                               | Allelic exchange vector, $Spec^R$ and $Gent^R$                                                                                                                                                               | This study                            |
| pBSV2G                               | Shuttle vector, $Gent^R$                                                                                                                                                                                     | (Elias et al. 2003)                   |
| pJSB268                              | pKFSS1:: $P_{pQE30}$ - <i>luc</i> + $P_{flaB}$ - <i>lacI</i> , $Spec^R$                                                                                                                                      | (J. S. Blevins et al. 2007)           |
| pJH380                               | pCR8 encoding 1.5kb <i>cyaB</i> upstream region                                                                                                                                                              | This study                            |
| pJH381                               | pCR8 encoding 1.5kb <i>cyaB</i> downstream region                                                                                                                                                            | This study                            |
| pJH383                               | pCR8 <i>cyaB</i> upstream and downstream regions                                                                                                                                                             | This study                            |
| pJH431                               | pCR2.1:: $P_{flgB}$ - <i>aadA</i>                                                                                                                                                                            | This study                            |
| pJH432                               | <i>cyaB</i> deletion construct, $Spec^R$                                                                                                                                                                     | This study                            |
| pJH446                               | pJH333:: <i>cyaB</i> , $Spec^R$                                                                                                                                                                              | This study                            |
| pVA85                                | pENTR1a-N3xFLAG:: <i>cyaB</i> -SR0623, $Kan^R$                                                                                                                                                               | This study                            |
| pVA87                                | pJSB268 with <i>Gent</i> cassette, $Gent^R$                                                                                                                                                                  | This study                            |
| pVA102                               | pVA87:: $P_{pQE30}$ -FLAG- <i>cyaB</i> , $Gent^R$                                                                                                                                                            | This study                            |

|                      |                                                                                |                         |
|----------------------|--------------------------------------------------------------------------------|-------------------------|
| pVA112               | pVA110::P <sub>cyaB</sub> 512-FLAG- <i>cyaB</i> , Gent <sup>R</sup>            | This study              |
| pVA114               | pVA110::P <sub>cyaB</sub> 512-FLAG- <i>cyaB</i> -SR0623, Gent <sup>R</sup>     | This study              |
| pVA146               | pVA110::P <sub>cyaB</sub> 512- <i>cyaB</i> -SR0623wobble, Gent <sup>R</sup>    | This study              |
| pBBE22 <i>luc</i>    | Shuttle luminescent vector P <sub>flaB</sub> - <i>Bbluc</i> , Kan <sup>R</sup> | (Hyde et al. 2011)      |
| pCR2.1::βactin       | pCR2.1 carrying murine β-actin, Kan <sup>R</sup>                               | (Maruskova et al. 2008) |
| pCR2.1:: <i>recA</i> | pCR2.1 carrying <i>B. burgdorferi recA</i> Kan <sup>R</sup>                    | (Wu et al. 2011)        |

639

640 **Table 2.** Tissue infectivity of *B. burgdorferi* infected mice.

| <b>Day 7</b>             |            | number of positive cultures/total |     |           |                      |
|--------------------------|------------|-----------------------------------|-----|-----------|----------------------|
| strain                   | lymph node | skin flank                        | ear | all sites | % positive all sites |
| WT                       | 5/5        | 5/5                               | 1/5 | 11/15     | 73                   |
| <i>cyaB</i> <sup>-</sup> | 0/5        | 1/5                               | 0/5 | 1/15      | 6                    |
| <i>c-cyaB</i>            | 0/5        | 0/5                               | 0/5 | 0/15      | 0                    |
| <i>c-cyaB</i> -SR0623    | 1/5        | 1/5                               | 0/5 | 2/15      | 13                   |
| <i>c-cyaB</i> -SR0623w   | 2/5        | 4/5                               | 0/5 | 6/15      | 40                   |

| <b>Day 14</b>            |            | number of positive cultures/total |     |           |                      |
|--------------------------|------------|-----------------------------------|-----|-----------|----------------------|
| strain                   | lymph node | skin flank                        | ear | all sites | % positive all sites |
| WT                       | 4/4        | 4/4                               | 4/4 | 12/12     | 100                  |
| <i>cyaB</i> <sup>-</sup> | 3/5        | 2/5                               | 0/5 | 5/15      | 33                   |
| <i>c-cyaB</i>            | 0/5        | 0/5                               | 0/5 | 0/20      | 0                    |
| <i>c-cyaB</i> -SR0623    | 2/5        | 2/5                               | 0/5 | 4/15      | 26                   |
| <i>c-cyaB</i> -SR0623w   | 1/5        | 1/5                               | 1/5 | 3/15      | 20                   |

| <b>Day 21</b>            |            | number of positive cultures/total |     |           |                      |
|--------------------------|------------|-----------------------------------|-----|-----------|----------------------|
| strain                   | lymph node | skin flank                        | ear | all sites | % positive all sites |
| WT                       | 5/5        | 5/5                               | 5/5 | 15/15     | 100                  |
| <i>cyaB</i> <sup>-</sup> | 2/5        | 2/5                               | 0/5 | 4/15      | 26                   |
| <i>c-cyaB</i>            | 1/5        | 1/5                               | 0/5 | 2/15      | 13                   |
| <i>c-cyaB</i> -SR0623    | 3/5        | 3/5                               | 0/5 | 6/15      | 40                   |
| <i>c-cyaB</i> -SR0623w   | 3/5        | 3/5                               | 1/5 | 7/15      | 46                   |

641

642 **Supplemental Table 1.** Primers used in this study.

| <b>Primer Name</b>             | <b>Sequence (5' to 3')</b>                                           | <b>Purpose</b> |
|--------------------------------|----------------------------------------------------------------------|----------------|
| <i>cyaB</i> US F               | CAACTCAACTTTACAGAGTCTGTTC                                            | Cloning        |
| <i>cyaB</i> US R BamHI<br>KpnI | ACGCGGATCCACGCGGTACCCTGAATTACTTTCAT<br>TGGCAAATCAAAG                 | Cloning        |
| <i>cyaB</i> DS F KpnI SphI     | ACGCGGTACCACGCGCATGCATATTAATAAATAATG<br>TAATTATG                     | Cloning        |
| <i>cyaB</i> DS F BamHI         | ACGCGGATCCGTGAATGCCTAAATTACTAAGTC                                    | Cloning        |
| PflgBF-SphI                    | ACGCGGTACCCTAATACCCGAGCTTCAAGG                                       | Cloning        |
| <i>aadAR</i> -KpnI             | GCGTGCATGCCAGATCCGGATATAGTTCCTCC                                     | Cloning        |
| <i>cyaB</i> FLAG-F-NotI        | ACGCGCGGCCGCCCTTTGAAATAGAATCAAAGC                                    | Cloning        |
| <i>cyaB</i> FLAG-R-XhoI        | ACGCCTCGAGGTGCTGACATTGGGCTTTAT                                       | Cloning        |
| BbgenupF BamHI                 | GGATCCTATGCCTATGCAAAAAGCAG                                           | Cloning        |
| BbgenupR HpaI ClaI             | GTAAACATCGATCAAAAAGCAGCTTGCAAATA                                     | Cloning        |
| BbgendownF HpaI<br>ClaI        | GTAAACATCGATTATGGCAGAGCTTGCAATTAT                                    | Cloning        |
| BbgendownR KpnI                | GGTACCGCAAGTGAAAACCTCAAACCTTG                                        | Cloning        |
| pFlggentF-HpaIMCS              | GTAAACGACGTCGACTGCAGTACTGAACGAATT                                    | Cloning        |
| PFlggentRHpaINotI              | GTAAACGCGGCCCGAGCTTCAAGGAAGA                                         | Cloning        |
| <i>bb0445</i> -F-BamHI         | ACGCGGATCCATGTTTGGTTTTGATTTAATAA                                     | Cloning        |
| <i>bb0445</i> -R               | ACGCGGATCCATGTTTGGTTTTGATTTAATAA                                     | Cloning        |
| PflgB-F-NotI                   | ACGCGCGGCCGCTAACGACGTCGACTGCAGTA<br>TACCCGAGCTTCAAGGAAGATTTCCATTAAAG | Cloning        |
| gent-R                         | CTGCTTTTTGTTAGGTGGCGGTA CT TGGGT                                     | Cloning        |
| PcyaB-F-SalI                   | ACGCGTCGACATTA AACCTATCATTTC AATTG                                   | Cloning        |
| PcyaB-R                        | TGTAGTCCATATATTAATAAATAATGTAATTATGAT                                 | Cloning        |
| <i>cyaB</i> BORF-F             | TTTTTAATATATGGACTACAAGGACCACGACGGCG                                  | Cloning        |
| <i>cyaB</i> BORF-R-SalI        | ACGCGTCGACTTATTTTTTACTTTGATTG                                        | Cloning        |
| <i>cyaB</i> SR0623-R-SalI      | ACGCGTCGACGTGCTGACATTGGGCTTTAT                                       | Cloning        |
| pJH446-F PstI                  | ACGCCTGCAGCCCAAGCTGGATTAGCAAC                                        | Cloning        |
| pJH446-R PstI                  | ACGCCTGCAGTGAGGACAATAATAATGTGAG                                      | Cloning        |
| PflgB-F-SalI                   | ACGCGTCGACTACCCGAGCTTCAAGGAAGA                                       | Cloning        |
| PflgB-R                        | GTAACATATAGAAACCTCCCTCATTTAAAAT                                      | Cloning        |
| GentR-F                        | GGGAGGTTTCTATATGTTACGCAGCAGCAAC                                      | Cloning        |
| GentR-R-AatII                  | ACGCGACGTCTTAGGTGGCGGTA CT TGGGT                                     | Cloning        |
| <i>cyaB</i> FLAG-F-NdeI        | ACGCCATATGATGGACTACAAGGACCACGA                                       | Cloning        |
| <i>cyaB</i> FLAG-R-HindIII     | ACGCAAGCTTTTATTTTTTACTTTGATTGCC                                      | Cloning        |
| <i>bb0722</i> RT F             | GTAGCGATTCCCTGAAAGC                                                  | RT-PCR         |
| <i>bb0722</i> RT R             | CCTTCCATTTCAACATTAGGAC                                               | RT-PCR         |
| <i>bb0723</i> RT F             | GTTTGAATAGAATCAAAGC                                                  | RT-PCR         |
| <i>bb0723</i> RT R             | CAGAGTAAGGTCTAGTTTC                                                  | RT-PCR         |
| <i>bb0724</i> RT F             | CCTGAAGCTATAGTTGTGG                                                  | RT-PCR         |

|                    |                                                    |          |
|--------------------|----------------------------------------------------|----------|
| <i>bb0724</i> RT R | CCTTCCAATTGCCAGATCC                                | RT-PCR   |
| <i>cyaB</i> F      | AGACAACAACAATACTGTAGAAA                            | qRT-PCR  |
| <i>cyaB</i> R      | TTATTTCGTTTATCTCTACATTTA                           | qRT-PCR  |
| <i>flaB</i> F      | CAGCTAATGTTGCAAATCTTTTCTCT                         | qRT-PCR  |
| <i>flaB</i> R      | TTCCTGTTGAACACCCTCTTGA                             | qRT-PCR  |
| <i>bosR</i> F      | ACCCTATTCAACTTGACGATATTAAGAT                       | qRT-PCR  |
| <i>bosR</i> R      | GCCCTGAGTAAATGATTTCAATAGATT                        | qRT-PCR  |
| <i>dbpA</i> F      | CAGATGCAGCTGAAGAGAATCCT                            | qRT-PCR  |
| <i>dbpA</i> R      | ACCCTTTGTAATTTTCTCTCATTTTT                         | qRT-PCR  |
| <i>badR</i> F      | ACGCACTGCTGAACTTTCGATTTGGT                         | qRT-PCR  |
| <i>badR</i> R      | ACGCAGCATATTGACACAACCCTT                           | qRT-PCR  |
| <i>plzA</i> F      | ACGCGGATGTCGAGGAAGATGCAA                           | qRT-PCR  |
| <i>plzA</i> R      | ACGCAAAGCAATACCAAGCGCAA                            | qRT-PCR  |
| <i>rpoS</i> F      | ACGCATGCAAACCTTGCGACTTGTT                          | qRT-PCR  |
| <i>rpoS</i> R      | ACGCATCCCAAGTTGCCTTCTTGA                           | qRT-PCR  |
| <i>ospC</i> F      | CGGATTCTAATGCGGTTTTACTTG                           | qRT-PCR  |
| <i>ospC</i> R      | CAATAGCTTTAGCAGCAATTCATCT                          | qRT-PCR  |
| <i>rrp1</i> F      | AAGGTGCTTACGAGATTGAG                               | qRT-PCR  |
| <i>rrp1</i> R      | TCTGTGGAACTTCTTGAACATA                             | qRT-PCR  |
| <i>hkl</i> F       | CGTCAATTTATTTTCTAAGGATATTTTC                       | qRT-PCR  |
| <i>hkl</i> R       | TGCTTCGTCTTCAATTCACT                               | qRT-PCR  |
| <i>ospA</i> F      | GCAACAGTAGACAAGCTTGAGC                             | qRT-PCR  |
| <i>ospA</i> R      | GTGTGGTTTGACCTAGATCGTCA                            | qRT-PCR  |
| <i>bbk32</i> F     | GAATATAAAGGGATGACTCAAGGAAGTT                       | qRT-PCR  |
| <i>bbk32</i> R     | TTTGGCCTTAAATCAGAATCTATAGTAAGA                     | qRT-PCR  |
| <i>recAB</i> F     | GTGGATCTATTGTATTAGATGAGGCT                         | qRT-PCR  |
| <i>recAB</i> R     | GCCAAAGTTCTGCAACATTAACACCT                         | qRT-PCR  |
| Bactin F           | ACGCAGAGGGAAATCGTGCGTGAC                           | qRT-PCR  |
| Bactin R           | ACGCGGGAGGAAGAGGATGCGGCAG                          | qRT-PCR  |
| SR0623 5' probe    | GCCAATGAAAGTAATTCAGAGTAAGGTCTAGTTTC<br>AATG        | Northern |
| SR0623 3' probe    | GCCCTCAGATTGGAATTTATGGCAATCAAGGGCTT<br>GTAATCTCTAC | Northern |



644 **Acknowledgements.**

645 Thank you to Dr. Jon Skare for the BosR antibody, Dr. Magnus Hook for the DbpA antibody, Dr.  
646 Richard Marconi for the Rrp2 and OspC antibodies, Dr. Seshu Janakiram for the BadR antibody,  
647 and Dr. Jenifer Coburn for P66 antibody. Appreciation to Dr. Rajesh Miranda for use of his ViiA7  
648 Real-Time PCR machine (Applied Biosystems). We thank Dr. Ulrike Munderloh for providing  
649 ISE6 cells. We also thank Dr. Jon Skare for thoughtful comments in the editing of this manuscript.

650 **Funding.**

651 Our funding was provided by the NIH R03 grant number AI103627-01A1.

652 **Conflict of interest statement.**

653 None of the authors have a financial conflict of interest.

654 **Author contributions.**

655 VA and JH were involved in the experimental design, data analysis and interpretation, and wrote  
656 manuscript; VA executed a majority of the experiments; LV mammalian tissue culture  
657 experiments; ES generated constructs and strains; AH & ML northern blots; ML consultation,  
658 experimental design, data analysis and interpretation; NO & RM antibody design and generation;  
659 AC tick tissue experiments. All authors were involved in manuscript editing.

660

661 **References.**

- 662 Adams, Philip P., Carlos Flores Avile, Niko Popitsch, Ivana Bilusic, Renée Schroeder, Meghan  
663 Lybecker, and Mollie W. Jewett. 2017. "In Vivo Expression Technology and 5' End  
664 Mapping of the *Borrelia burgdorferi* Transcriptome Identify Novel RNAs Expressed  
665 during Mammalian Infection." *Nucleic Acids Research* 45 (2): 775–92.  
666 <https://doi.org/10.1093/nar/gkw1180>.
- 667 Babitzke, Paul, Ying-Jung Lai, Andrew J. Renda, and Tony Romeo. 2019. "Posttranscription  
668 Initiation Control of Gene Expression Mediated by Bacterial RNA-Binding Proteins."  
669 *Annual Review of Microbiology* 73 (1): 43–67. [https://doi.org/10.1146/annurev-micro-  
670 020518-115907](https://doi.org/10.1146/annurev-micro-020518-115907).
- 671 Barbour, A. G. 1984. "Isolation and Cultivation of Lyme Disease Spirochetes." *The Yale Journal*  
672 *of Biology and Medicine* 57 (4): 521–25.
- 673 Bilusic, Ivana, Niko Popitsch, Philipp Rescheneder, Renée Schroeder, and Meghan Lybecker.  
674 2014. "Revisiting the Coding Potential of the *E. Coli* Genome through Hfq Co-  
675 Immunoprecipitation." *RNA Biology* 11 (5): 641–54. <https://doi.org/10.4161/rna.29299>.
- 676 Blevins, J. S., A. T. Revel, A. H. Smith, G. N. Bachlani, and M. V. Norgard. 2007. "Adaptation of a  
677 Luciferase Gene Reporter and Lac Expression System to *Borrelia burgdorferi*." *Appl*  
678 *Environ Microbiol* 73 (5): 1501–13.
- 679 Blevins, Jon S., Haijun Xu, Ming He, Michael V. Norgard, Larry Reitzer, and X. Frank Yang. 2009.  
680 "Rrp2, a  $\Sigma$ 54-Dependent Transcriptional Activator of *Borrelia burgdorferi*, Activates RpoS  
681 in an Enhancer-Independent Manner." *Journal of Bacteriology* 191 (8): 2902–5.  
682 <https://doi.org/10.1128/JB.01721-08>.
- 683 Bontemps-Gallo, Sébastien, Kevin Lawrence, and Frank C. Gherardini. 2016. "Two Different  
684 Virulence-Related Regulatory Pathways in *Borrelia burgdorferi* Are Directly Affected by  
685 Osmotic Fluxes in the Blood Meal of Feeding Ixodes Ticks." *PLoS Pathogens* 12 (8):  
686 e1005791. <https://doi.org/10.1371/journal.ppat.1005791>.
- 687 Botsford, J. L., and J. G. Harman. 1992. "Cyclic AMP in Prokaryotes." *Microbiology and*  
688 *Molecular Biology Reviews* 56 (1): 100–122.
- 689 Boylan, J. A., C. S. Hummel, S. Benoit, J. Garcia-Lara, J. Treglown-Downey, E. J. Crane, and F. C.  
690 Gherardini. 2006. "*Borrelia burgdorferi* Bb0728 Encodes a Coenzyme A Disulphide  
691 Reductase Whose Function Suggests a Role in Intracellular Redox and the Oxidative  
692 Stress Response." *Mol Microbiol* 59 (2): 475–86.
- 693 Boylan, J. A., K. A. Lawrence, J. S. Downey, and F. C. Gherardini. 2008. "*Borrelia burgdorferi*  
694 Membranes Are the Primary Targets of Reactive Oxygen Species." *Mol Microbiol* 68 (3):  
695 786–99.
- 696 Boylan, J. A., J. E. Posey, and F. C. Gherardini. 2003. "*Borrelia* Oxidative Stress Response  
697 Regulator, BosR: A Distinctive Zn-Dependent Transcriptional Activator." *Proc Natl Acad*  
698 *Sci U S A* 100 (20): 11684–89.
- 699 Caimano, M. J., C. H. Eggers, K. R. Hazlett, and J. D. Radolf. 2004. "RpoS Is Not Central to the  
700 General Stress Response in *Borrelia burgdorferi* but Does Control Expression of One or  
701 More Essential Virulence Determinants." *Infect Immun* 72 (11): 6433–45.
- 702 Caimano, M. J., R. Iyer, C. H. Eggers, C. Gonzalez, E. A. Morton, M. A. Gilbert, I. Schwartz, and J.  
703 D. Radolf. 2007. "Analysis of the RpoS Regulon in *Borrelia burgdorferi* in Response to

- 704 Mammalian Host Signals Provides Insight into RpoS Function during the Enzoitic Cycle.”  
705 *Mol Microbiol* 65 (5): 1193–1217.
- 706 Caimano, Melissa J., Star Dunham-Ems, Anna M. Allard, Maria B. Cassera, Melisha Kenedy, and  
707 Justin D. Radolf. 2015. “C-Di-GMP Modulates Gene Expression in Lyme Disease  
708 Spirochetes at the Tick-Mammal Interface to Promote Spirochete Survival during the  
709 Blood Meal and Tick-to-Mammal Transmission.” *Infection and Immunity*, May.  
710 <https://doi.org/10.1128/IAI.00315-15>.
- 711 Caimano, Melissa J., Christian H. Eggers, Cynthia A. Gonzalez, and Justin D. Radolf. 2005.  
712 “Alternate Sigma Factor RpoS Is Required for the In Vivo-Specific Repression of *Borrelia*  
713 *Burgdorferi* Plasmid Lp54-Borne OspA and Lp6.6 Genes.” *Journal of Bacteriology* 187  
714 (22): 7845–52. <https://doi.org/10.1128/JB.187.22.7845-7852.2005>.
- 715 Caimano, Melissa J., Ashley M. Groshong, Alexia Belperron, Jialing Mao, Kelly L. Hawley, Amit  
716 Luthra, Danielle E. Graham, et al. 2019. “The RpoS Gatekeeper in *Borrelia Burgdorferi*:  
717 An Invariant Regulatory Scheme That Promotes Spirochete Persistence in Reservoir  
718 Hosts and Niche Diversity.” *Frontiers in Microbiology* 10.  
719 <https://doi.org/10.3389/fmicb.2019.01923>.
- 720 Caimano, Melissa J., Radha Iyer, Christian H. Eggers, Cynthia Gonzalez, Elizabeth A. Morton,  
721 Michael A. Gilbert, Ira Schwartz, and Justin D. Radolf. 2007. “Analysis of the RpoS  
722 Regulon in *Borrelia Burgdorferi* in Response to Mammalian Host Signals Provides Insight  
723 into RpoS Function during the Enzoitic Cycle.” *Molecular Microbiology* 65 (5): 1193–  
724 1217. <https://doi.org/10.1111/j.1365-2958.2007.05860.x>.
- 725 Cann, Martin J., Arne Hammer, Jie Zhou, and Tobias Kanacher. 2003. “A Defined Subset of  
726 Adenylyl Cyclases Is Regulated by Bicarbonate Ion\*.” *Journal of Biological Chemistry* 278  
727 (37): 35033–38. <https://doi.org/10.1074/jbc.M303025200>.
- 728 Carroll, J. A., R. M. Cordova, and C. F. Garon. 2000. “Identification of 11 PH-Regulated Genes in  
729 *Borrelia Burgdorferi* Localizing to Linear Plasmids.” *Infect Immun* 68 (12): 6677–84.
- 730 Carroll, J. A., C. F. Garon, and T. G. Schwan. 1999. “Effects of Environmental PH on Membrane  
731 Proteins in *Borrelia Burgdorferi*.” *Infect Immun* 67 (7): 3181–87.
- 732 Casjens, S., N. Palmer, R. van Vugt, W. M. Huang, B. Stevenson, P. Rosa, R. Lathigra, et al. 2000.  
733 “A Bacterial Genome in Flux: The Twelve Linear and Nine Circular Extrachromosomal  
734 DNAs in an Infectious Isolate of the Lyme Disease Spirochete *Borrelia Burgdorferi*.” *Mol*  
735 *Microbiol* 35 (3): 490–516.
- 736 Cugini, C., M. Medrano, T. G. Schwan, and J. Coburn. 2003. “Regulation of Expression of the  
737 *Borrelia Burgdorferi* Beta(3)-Chain Integrin Ligand, P66, in Ticks and in Culture.” *Infect*  
738 *Immun* 71 (2): 1001–7.
- 739 Curtiss, R., and S. M. Kelly. 1987. “*Salmonella Typhimurium* Deletion Mutants Lacking Adenylate  
740 Cyclase and Cyclic AMP Receptor Protein Are Avirulent and Immunogenic.” *Infection and*  
741 *Immunity* 55 (12): 3035–43.
- 742 Dong, Qing, Xufan Yan, Minhui Zheng, and Ziwen Yang. 2013. “Comparison of Two Type IV  
743 Hyperthermophilic Adenylyl Cyclases Characterizations from the Archaeon *Pyrococcus*  
744 *Furiosus*.” *Journal of Molecular Catalysis B: Enzymatic* 88 (April): 7–13.  
745 <https://doi.org/10.1016/j.molcatb.2012.10.017>.
- 746 Drecktrah, Dan, Laura S. Hall, Philipp Rescheneder, Meghan Lybecker, and D. Scott Samuels.  
747 2018. “The Stringent Response-Regulated SRNA Transcriptome of *Borrelia Burgdorferi*.”

- 748 *Frontiers in Cellular and Infection Microbiology* 8: 231.  
749 <https://doi.org/10.3389/fcimb.2018.00231>.
- 750 Elias, Abdallah F., James L. Bono, John J. Kupko Iii, Philip E. Stewart, Jonathan G. Krum, and  
751 Patricia A. Rosa. 2003. "New Antibiotic Resistance Cassettes Suitable for Genetic Studies  
752 in *Borrelia burgdorferi*." *Journal of Molecular Microbiology and Biotechnology* 6 (1): 29–  
753 40. <https://doi.org/10.1159/000073406>.
- 754 Franchini, Alessandro G., Julian Ihssen, and Thomas Egli. 2015. "Effect of Global Regulators  
755 RpoS and Cyclic-AMP/CRP on the Catabolome and Transcriptome of *Escherichia coli* K12  
756 during Carbon- and Energy-Limited Growth." *PLoS One* 10 (7): e0133793.  
757 <https://doi.org/10.1371/journal.pone.0133793>.
- 758 Freedman, John C., Elizabeth A. Rogers, Jessica L. Kostick, Hongming Zhang, Radha Iyer, Ira  
759 Schwartz, and Richard T. Marconi. 2010. "Identification and Molecular Characterization  
760 of a Cyclic-Di-GMP Effector Protein, PlzA (BB0733): Additional Evidence for the Existence  
761 of a Functional Cyclic-Di-GMP Regulatory Network in the Lyme Disease Spirochete,  
762 *Borrelia burgdorferi*." *FEMS Immunology and Medical Microbiology* 58 (2): 285–94.  
763 <https://doi.org/10.1111/j.1574-695X.2009.00635.x>.
- 764 Gallagher, D. Travis, Natasha N. Smith, Sook-Kyung Kim, Annie Heroux, Howard Robinson, and  
765 Prasad T. Reddy. 2006. "Structure of the Class IV Adenylyl Cyclase Reveals a Novel Fold."  
766 *Journal of Molecular Biology* 362 (1): 114–22.  
767 <https://doi.org/10.1016/j.jmb.2006.07.008>.
- 768 Gottesman, Susan, and Gisela Storz. 2011. "Bacterial Small RNA Regulators: Versatile Roles and  
769 Rapidly Evolving Variations." *Cold Spring Harbor Perspectives in Biology* 3 (12).  
770 <https://doi.org/10.1101/cshperspect.a003798>.
- 771 Gstrein-Reider, E, and M Schweiger. 1982. "Regulation of Adenylyl Cyclase in *E. coli*." *The*  
772 *EMBO Journal* 1 (3): 333–37.
- 773 Guo, B. P., E. L. Brown, D. W. Dorward, L. C. Rosenberg, and M. Hook. 1998. "Decorin-Binding  
774 Adhesins from *Borrelia burgdorferi*." *Mol Microbiol* 30 (4): 711–23.
- 775 He, Ming, Bethany K. Boardman, Dalai Yan, and X. Frank Yang. 2007. "Regulation of Expression  
776 of the Fibronectin-Binding Protein BBK32 in *Borrelia burgdorferi*." *Journal of*  
777 *Bacteriology* 189 (22): 8377–80. <https://doi.org/10.1128/JB.01199-07>.
- 778 He, Ming, Zhiming Ouyang, Bryan Troxell, Haijun Xu, Akira Moh, Joseph Piesman, Michael V.  
779 Norgard, Mark Gomelsky, and X. Frank Yang. 2011. "Cyclic Di-GMP Is Essential for the  
780 Survival of the Lyme Disease Spirochete in Ticks." *PLOS Pathogens* 7 (6): e1002133.  
781 <https://doi.org/10.1371/journal.ppat.1002133>.
- 782 He, Ming, Jun-Jie Zhang, Meiping Ye, Yongliang Lou, and X. Frank Yang. 2014. "Cyclic Di-GMP  
783 Receptor PlzA Controls Virulence Gene Expression through RpoS in *Borrelia*  
784 *burgdorferi*." *Infection and Immunity* 82 (1): 445–52. [https://doi.org/10.1128/IAI.01238-](https://doi.org/10.1128/IAI.01238-13)  
785 13.
- 786 Hoffmaster, A. R., and T. M. Koehler. 1997. "The Anthrax Toxin Activator Gene *AtxA* Is  
787 Associated with CO<sub>2</sub>-Enhanced Non-Toxin Gene Expression in *Bacillus anthracis*." *Infect*  
788 *Immun* 65 (8): 3091–99.
- 789 Hu, Linden T. 2016. "Lyme Disease." *Annals of Internal Medicine* 165 (9): 677.  
790 <https://doi.org/10.7326/L16-0409>.

- 791 Hübner, A., X. Yang, D. M. Nolen, T. G. Popova, F. C. Cabello, and M. V. Norgard. 2001.  
792 “Expression of *Borrelia burgdorferi* OspC and DbpA Is Controlled by a RpoN-RpoS  
793 Regulatory Pathway.” *Proceedings of the National Academy of Sciences of the United*  
794 *States of America* 98 (22): 12724–29. <https://doi.org/10.1073/pnas.231442498>.
- 795 Hyde, Jenny A., Dana K. Shaw, Roger Smith Iii, Jerome P. Trzeciakowski, and Jon T. Skare. 2009.  
796 “The BosR Regulatory Protein of *Borrelia burgdorferi* Interfaces with the RpoS  
797 Regulatory Pathway and Modulates Both the Oxidative Stress Response and Pathogenic  
798 Properties of the Lyme Disease Spirochete.” *Molecular Microbiology* 74 (6): 1344–55.  
799 <https://doi.org/10.1111/j.1365-2958.2009.06951.x>.
- 800 Hyde, Jenny A., Dana K. Shaw, Roger Smith, Jerome P. Trzeciakowski, and Jon T. Skare. 2010.  
801 “Characterization of a Conditional BosR Mutant in *Borrelia burgdorferi*” 78 (1): 265–74.  
802 <https://doi.org/10.1128/IAI.01018-09>.
- 803 Hyde, Jenny A., and Jon T. Skare. 2018. “Detection of Bioluminescent *Borrelia burgdorferi* from  
804 In Vitro Cultivation and During Murine Infection.” *Methods in Molecular Biology (Clifton,*  
805 *N.J.)* 1690: 241–57. [https://doi.org/10.1007/978-1-4939-7383-5\\_18](https://doi.org/10.1007/978-1-4939-7383-5_18).
- 806 Hyde, Jenny A., Jerome P. Trzeciakowski, and Jonathan T. Skare. 2007. “*Borrelia burgdorferi*  
807 Alters Its Gene Expression and Antigenic Profile in Response to CO<sub>2</sub> Levels.” *Journal of*  
808 *Bacteriology* 189 (2): 437–45. <https://doi.org/10.1128/JB.01109-06>.
- 809 Hyde, Jenny A., Eric H. Weening, MiHee Chang, Jerome P. Trzeciakowski, Magnus Höök, Jeffrey  
810 D. Cirillo, and Jon T. Skare. 2011. “Bioluminescent Imaging of *Borrelia burgdorferi* in Vivo  
811 Demonstrates That the Fibronectin-Binding Protein BBK32 Is Required for Optimal  
812 Infectivity.” *Molecular Microbiology* 82 (1): 99–113. [https://doi.org/10.1111/j.1365-](https://doi.org/10.1111/j.1365-2958.2011.07801.x)  
813 [2958.2011.07801.x](https://doi.org/10.1111/j.1365-2958.2011.07801.x).
- 814 Hyde, Jenny A., Eric H. Weening, and Jon T. Skare. 2011. “Genetic Transformation of *Borrelia*  
815 *burgdorferi*.” *Current Protocols in Microbiology* 20 (1): 12C.4.1-12C.4.17.  
816 <https://doi.org/10.1002/9780471729259.mc12c04s20>.
- 817 Iosub, Ira Alexandra, Robert Willem van Nues, Stuart William McKellar, Karen Jule Nieken,  
818 Marta Marchioretto, Brandon Sy, Jai Justin Tree, Gabriella Viero, and Sander  
819 Granneman. 2020. “Hfq CLASH Uncovers SRNA-Target Interaction Networks Linked to  
820 Nutrient Availability Adaptation.” Edited by Joseph T Wade, James L Manley, and Ben F  
821 Luisi. *ELife* 9 (May): e54655. <https://doi.org/10.7554/eLife.54655>.
- 822 Izac, Jerilyn R., Andrew C. Camire, Christopher G. Earnhart, Monica E. Embers, Rebecca A. Funk,  
823 Edward B. Breitschwerdt, and Richard T. Marconi. 2019. “Analysis of the Antigenic  
824 Determinants of the OspC Protein of the Lyme Disease Spirochetes: Evidence That the  
825 C10 Motif Is Not Immunodominant or Required to Elicit Bactericidal Antibody  
826 Responses.” *Vaccine* 37 (17): 2401–7. <https://doi.org/10.1016/j.vaccine.2019.02.007>.
- 827 Kamenetsky, Margarita, Sabine Middelhaufe, Erin M. Bank, Lonny R. Levin, Jochen Buck, and  
828 Clemens Steegborn. 2006. “Molecular Details of CAMP Generation in Mammalian Cells:  
829 A Tale of Two Systems.” *Journal of Molecular Biology* 362 (4): 623–39.  
830 <https://doi.org/10.1016/j.jmb.2006.07.045>.
- 831 Kawabata, H., S. J. Norris, and H. Watanabe. 2004. “BBE02 Disruption Mutants of *Borrelia*  
832 *burgdorferi* B31 Have a Highly Transformable, Infectious Phenotype.” *Infect Immun* 72  
833 (12): 7147–54.



- 834 Khajanchi, Bijay K., Evelyn Odeh, Lihui Gao, Mary B. Jacobs, Mario T. Philipp, Tao Lin, and Steven  
835 J. Norris. 2016. "Phosphoenolpyruvate Phosphotransferase System Components  
836 Modulate Gene Transcription and Virulence of *Borrelia burgdorferi*." *Infection and  
837 Immunity* 84 (3): 754–64. <https://doi.org/10.1128/IAI.00917-15>.
- 838 Konkel, M. E., and K. Tilly. 2000. "Temperature-Regulated Expression of Bacterial Virulence  
839 Genes." *Microbes Infect* 2 (2): 157–66.
- 840 Kostick, Jessica L., Lee T. Szkotnicki, Elizabeth A. Rogers, Paola Bocci, Nadia Raffaelli, and  
841 Richard T. Marconi. 2011. "The Diguanylate Cyclase, Rrp1, Regulates Critical Steps in the  
842 Enzootic Cycle of the Lyme Disease Spirochetes." *Molecular Microbiology* 81 (1): 219–  
843 31. <https://doi.org/10.1111/j.1365-2958.2011.07687.x>.
- 844 Kostick-Dunn, Jessica L., Jerilyn R. Izac, John C. Freedman, Lee T. Szkotnicki, Lee D. Oliver, and  
845 Richard T. Marconi. 2018. "The *Borrelia burgdorferi* C-Di-GMP Binding Receptors, PlzA  
846 and PlzB, Are Functionally Distinct." *Frontiers in Cellular and Infection Microbiology* 8:  
847 213. <https://doi.org/10.3389/fcimb.2018.00213>.
- 848 Labandeira-Rey, M., and J. T. Skare. 2001. "Decreased Infectivity in *Borrelia burgdorferi* Strain  
849 B31 Is Associated with Loss of Linear Plasmid 25 or 28-1." *Infection and Immunity* 69 (1):  
850 446–55. <https://doi.org/10.1128/IAI.69.1.446-455.2001>.
- 851 Lackum, Kate von, and Brian Stevenson. 2005. "Carbohydrate Utilization by the Lyme Borreliosis  
852 Spirochete, *Borrelia burgdorferi*." *FEMS Microbiology Letters* 243 (1): 173–79.  
853 <https://doi.org/10.1016/j.femsle.2004.12.002>.
- 854 Lawrenz, M. B., H. Kawabata, J. E. Purser, and S. J. Norris. 2002. "Decreased Electroporation  
855 Efficiency in *Borrelia burgdorferi* Containing Linear Plasmids Lp25 and Lp56: Impact on  
856 Transformation of Infectious *B. burgdorferi*." *Infect Immun* 70 (9): 4798–4804.
- 857 Li, X., U. Pal, N. Ramamoorthi, X. Liu, D. C. Desrosiers, C. H. Eggers, J. F. Anderson, J. D. Radolf,  
858 and E. Fikrig. 2007. "The Lyme Disease Agent *Borrelia burgdorferi* Requires BB0690, a  
859 Dps Homologue, to Persist within Ticks." *Mol Microbiol* 63 (3): 694–710.
- 860 Liang, Weili, Alberto Pascual-Montano, Anisia J. Silva, and Jorge A. Benitez. 2007. "The Cyclic  
861 AMP Receptor Protein Modulates Quorum Sensing, Motility and Multiple Genes That  
862 Affect Intestinal Colonization in *Vibrio Cholerae*." *Microbiology*, 153 (9): 2964–75.  
863 <https://doi.org/10.1099/mic.0.2007/006668-0>.
- 864 Liu, Cong, Di Sun, Jingrong Zhu, Jiawen Liu, and Weijie Liu. 2020. "The Regulation of Bacterial  
865 Biofilm Formation by CAMP-CRP: A Mini-Review." *Frontiers in Microbiology* 11.  
866 <https://doi.org/10.3389/fmicb.2020.00802>.
- 867 Livak, K. J., and T. D. Schmittgen. 2001. "Analysis of Relative Gene Expression Data Using Real-  
868 Time Quantitative PCR and the 2<sup>-Delta Delta C(T)</sup> Method." *Methods (San Diego, Calif.)*  
869 25 (4): 402–8. <https://doi.org/10.1006/meth.2001.1262>.
- 870 Livengood, Jill A., Virginia L. Schmit, and Robert D. Gilmore. 2008. "Global Transcriptome  
871 Analysis of *Borrelia burgdorferi* during Association with Human Neuroglial Cells."  
872 *Infection and Immunity* 76 (1): 298–307. <https://doi.org/10.1128/IAI.00866-07>.
- 873 Lybecker, M., and KC Henderson. 2018. "*Borrelia burgdorferi* Transcriptome Analysis by RNA-  
874 Sequencing." In *Borrelia burgdorferi: Methods and Protocols*, edited by Utpal Pal and  
875 Ozlem Buyuktanir, 127–36. Methods in Molecular Biology. New York, NY: Springer.
- 876 Lybecker, Meghan, Bob Zimmermann, Ivana Bilusic, Nadezda Tukhtubaeva, and Renée  
877 Schroeder. 2014. "The Double-Stranded Transcriptome of *Escherichia coli*." *Proceedings*



- 878 *of the National Academy of Sciences of the United States of America* 111 (8): 3134–39.  
879 <https://doi.org/10.1073/pnas.1315974111>.
- 880 Mallory, Katherine L., Daniel P. Miller, Lee D. Oliver, John C. Freedman, Jessica L. Kostick-Dunn,  
881 Jason A. Carlyon, James D. Marion, Jessica K. Bell, and Richard T. Marconi. 2016. “Cyclic-  
882 Di-GMP Binding Induces Structural Rearrangements in the PlzA and PlzC Proteins of the  
883 Lyme Disease and Relapsing Fever Spirochetes: A Possible Switch Mechanism for c-Di-  
884 GMP-Mediated Effector Functions.” *Pathogens and Disease* 74 (8).  
885 <https://doi.org/10.1093/femspd/ftw105>.
- 886 Maruskova, Mahulena, M. Dolores Esteve-Gassent, Valerie L. Sexton, and J. Seshu. 2008. “Role  
887 of the BBA64 Locus of *Borrelia burgdorferi* in Early Stages of Infectivity in a Murine  
888 Model of Lyme Disease.” *Infection and Immunity* 76 (1): 391–402.  
889 <https://doi.org/10.1128/IAI.01118-07>.
- 890 McDonough, Kathleen A., and Ana Rodriguez. 2011. “The Myriad Roles of Cyclic AMP in  
891 Microbial Pathogens: From Signal to Sword.” *Nature Reviews Microbiology* 10  
892 (November): 27.
- 893 Melamed, Sahar, Philip P. Adams, Aixia Zhang, Hongen Zhang, and Gisela Storz. 2020. “RNA-  
894 RNA Interactomes of ProQ and Hfq Reveal Overlapping and Competing Roles.”  
895 *Molecular Cell* 77 (2): 411–425.e7. <https://doi.org/10.1016/j.molcel.2019.10.022>.
- 896 Melamed, Sahar, Asaf Peer, Raya Faigenbaum-Romm, Yair E. Gatt, Niv Reiss, Amir Bar, Yael  
897 Altuvia, Liron Argaman, and Hanah Margalit. 2016. “Global Mapping of Small RNA-  
898 Target Interactions in Bacteria.” *Molecular Cell* 63 (5): 884–97.  
899 <https://doi.org/10.1016/j.molcel.2016.07.026>.
- 900 Miller, Christine L., S. L. Rajasekhar Karna, and J. Seshu. 2013. “*Borrelia* Host Adaptation  
901 Regulator (BadR) Regulates RpoS to Modulate Host Adaptation and Virulence Factors in  
902 *Borrelia burgdorferi*.” *Molecular Microbiology* 88 (1): 105–24.  
903 <https://doi.org/10.1111/mmi.12171>.
- 904 Miller, Daniel P., Lee D. Oliver, Brittney K. Tegels, Lucas A. Reed, Nathaniel S. O’Bier, Kurni  
905 Kurniyati, Lindsay A. Faust, et al. 2016. “The *Treponema denticola* FhbB Protein Is a  
906 Dominant Early Antigen That Elicits FhbB Variant-Specific Antibodies That Block Factor H  
907 Binding and Cleavage by Dentilisin.” *Infection and Immunity* 84 (7): 2051–58.  
908 <https://doi.org/10.1128/IAI.01542-15>.
- 909 Molina-Quiroz, Roberto C., Cecilia Silva-Valenzuela, Jennifer Brewster, Eduardo Castro-Nallar,  
910 Stuart B. Levy, and Andrew Camilli. 2018. “Cyclic AMP Regulates Bacterial Persistence  
911 through Repression of the Oxidative Stress Response and SOS-Dependent DNA Repair in  
912 Uropathogenic *Escherichia coli*.” *MBio* 9 (1). <https://doi.org/10.1128/mBio.02144-17>.
- 913 Mouali, Youssef El, Tania Gaviria-Cantin, María Antonia Sánchez-Romero, Marta Gibert,  
914 Alexander J. Westermann, Jörg Vogel, and Carlos Balsalobre. 2018. “CRP-CAMP  
915 Mediates Silencing of *Salmonella* Virulence at the Post-Transcriptional Level.” *PLOS*  
916 *Genetics* 14 (6): e1007401. <https://doi.org/10.1371/journal.pgen.1007401>.
- 917 Novak, Elizabeth A., Syed Z. Sultan, and Md A. Motaleb. 2014. “The Cyclic-Di-GMP Signaling  
918 Pathway in the Lyme Disease Spirochete, *Borrelia burgdorferi*.” *Frontiers in Cellular and*  
919 *Infection Microbiology* 4: 56. <https://doi.org/10.3389/fcimb.2014.00056>.
- 920 Oliver, J. H., F. W. Chandler, M. P. Luttrell, A. M. James, D. E. Stallknecht, B. S. McGuire, H. J.  
921 Hutcheson, G. A. Cummins, and R. S. Lane. 1993. “Isolation and Transmission of the

- 922 Lyme Disease Spirochete from the Southeastern United States." *Proceedings of the*  
923 *National Academy of Sciences of the United States of America* 90 (15): 7371–75.
- 924 Oliver, Jonathan D., Adela S. Oliva Chávez, Roderick F. Felsheim, Timothy J. Kurtti, and Ulrike G.  
925 Munderloh. 2015. "An Ixodes Scapularis Cell Line with a Predominantly Neuron-like  
926 Phenotype." *Experimental & Applied Acarology* 66 (3): 427–42.  
927 <https://doi.org/10.1007/s10493-015-9908-1>.
- 928 Ouyang, Z., J. S. Blevins, and M. V. Norgard. 2008. "Transcriptional Interplay among the  
929 Regulators Rrp2, RpoN and RpoS in *Borrelia Burgdorferi*." *Microbiology (Reading,*  
930 *England)* 154 (Pt 9): 2641–58.
- 931 Ouyang, Zhiming, Ranjit K. Deka, and Michael V. Norgard. 2011. "BosR (BB0647) Controls the  
932 RpoN-RpoS Regulatory Pathway and Virulence Expression in *Borrelia Burgdorferi* by a  
933 Novel DNA-Binding Mechanism." *PLOS Pathogens* 7 (2): e1001272.  
934 <https://doi.org/10.1371/journal.ppat.1001272>.
- 935 Ouyang, Zhiming, Manish Kumar, Toru Kariu, Shayma Haq, Martin Goldberg, Utpal Pal, and  
936 Michael V. Norgard. 2009. "BosR (BB0647) Governs Virulence Expression in *Borrelia*  
937 *Burgdorferi*." *Molecular Microbiology* 74 (6): 1331–43. [https://doi.org/10.1111/j.1365-](https://doi.org/10.1111/j.1365-2958.2009.06945.x)  
938 [2958.2009.06945.x](https://doi.org/10.1111/j.1365-2958.2009.06945.x).
- 939 Papenfort, Kai, and Jörg Vogel. 2010. "Regulatory RNA in Bacterial Pathogens." *Cell Host &*  
940 *Microbe* 8 (1): 116–27. <https://doi.org/10.1016/j.chom.2010.06.008>.
- 941 Peterkofsky, Alan, and Celia Gazdar. 1974. "Glucose Inhibition of Adenylate Cyclase in Intact  
942 Cells of *Escherichia Coli* B." *Proceedings of the National Academy of Sciences of the*  
943 *United States of America* 71 (6): 2324–28.
- 944 Popitsch, Niko, Ivana Bilusic, Philipp Rescheneder, Renée Schroeder, and Meghan Lybecker.  
945 2017. "Temperature-Dependent SRNA Transcriptome of the Lyme Disease Spirochete."  
946 *BMC Genomics* 18 (January). <https://doi.org/10.1186/s12864-016-3398-3>.
- 947 Purificação, Aline Dias da, Nathalia Marins de Azevedo, Gabriel Guarany de Araujo, Robson  
948 Francisco de Souza, and Cristiane Rodrigues Guzzo. 2020. "The World of Cyclic  
949 Dinucleotides in Bacterial Behavior." *Molecules* 25 (10): 2462.  
950 <https://doi.org/10.3390/molecules25102462>.
- 951 Radolf, Justin D, Melissa J Caimano, Brian Stevenson, and Linden T Hu. 2012. "Of Ticks, Mice  
952 and Men: Understanding the Dual-Host Lifestyle of Lyme Disease Spirochaetes." *Nature*  
953 *Reviews. Microbiology* 10 (2): 87–99. <https://doi.org/10.1038/nrmicro2714>.
- 954 Ramsey, Meghan E., Jenny A. Hyde, Diana N. Medina-Perez, Tao Lin, Lihui Gao, Maureen E.  
955 Lundt, Xin Li, Steven J. Norris, Jon T. Skare, and Linden T. Hu. 2017. "A High-Throughput  
956 Genetic Screen Identifies Previously Uncharacterized *Borrelia Burgdorferi* Genes  
957 Important for Resistance against Reactive Oxygen and Nitrogen Species." *PLOS*  
958 *Pathogens* 13 (2): e1006225. <https://doi.org/10.1371/journal.ppat.1006225>.
- 959 Rebollo-Ramirez, Sonia, and Gerald Larrouy-Maumus. 2019. "NaCl Triggers the CRP-Dependent  
960 Increase of CAMP in *Mycobacterium Tuberculosis*." *Tuberculosis (Edinburgh, Scotland)*  
961 116: 8–16. <https://doi.org/10.1016/j.tube.2019.03.009>.
- 962 Rogers, Elizabeth A., Darya Terekhova, Hong-Ming Zhang, Kelley M. Hovis, Ira Schwartz, and  
963 Richard T. Marconi. 2009. "Rrp1, a Cyclic-Di-GMP-Producing Response Regulator, Is an  
964 Important Regulator of *Borrelia Burgdorferi* Core Cellular Functions." *Molecular*  
965 *Microbiology* 71 (6): 1551–73. <https://doi.org/10.1111/j.1365-2958.2009.06621.x>.

- 966 Rosenberg, Ronald. 2018. "Vital Signs: Trends in Reported Vectorborne Disease Cases — United  
967 States and Territories, 2004–2016." *MMWR. Morbidity and Mortality Weekly Report* 67.  
968 <https://doi.org/10.15585/mmwr.mm6717e1>.
- 969 Samuels, D S, K E Mach, and C F Garon. 1994. "Genetic Transformation of the Lyme Disease  
970 Agent *Borrelia Burgdorferi* with Coumarin-Resistant GyrB." *Journal of Bacteriology* 176  
971 (19): 6045–49.
- 972 Samuels, D. Scott, and Leah R. N. Samuels. 2016. "Gene Regulation During the Enzootic Cycle of  
973 the Lyme Disease Spirochete." *Forum on Immunopathological Diseases and Therapeutics*  
974 7 (3–4): 205–12. <https://doi.org/10.1615/ForumImmDisTher.2017019469>.
- 975 Saputra, Elizabeth P., Jerome P. Trzeciakowski, and Jenny A. Hyde. 2020. "Borrelia Burgdorferi  
976 Spatiotemporal Regulation of Transcriptional Regulator BosR and Decorin Binding  
977 Protein during Murine Infection." *Scientific Reports* 10 (1): 12534.  
978 <https://doi.org/10.1038/s41598-020-69212-7>.
- 979 Savage, Christina R., William K. Arnold, Alexandra Gjevre-Nail, Benjamin J. Koestler, Eric L.  
980 Bruger, Jeffrey R. Barker, Christopher M. Waters, and Brian Stevenson. 2015.  
981 "Intracellular Concentrations of *Borrelia Burgdorferi* Cyclic Di-AMP Are Not Changed by  
982 Altered Expression of the CdaA Synthase." *PLoS One* 10 (4): e0125440.  
983 <https://doi.org/10.1371/journal.pone.0125440>.
- 984 Schmit, Virginia L., Toni G. Patton, and Robert D. Gilmore. 2011. "Analysis of *Borrelia*  
985 *Burgdorferi* Surface Proteins as Determinants in Establishing Host Cell Interactions."  
986 *Frontiers in Microbiology* 2: 141. <https://doi.org/10.3389/fmicb.2011.00141>.
- 987 Seshu, J., J. A. Boylan, F. C. Gherardini, and J. T. Skare. 2004. "Dissolved Oxygen Levels Alter  
988 Gene Expression and Antigen Profiles in *Borrelia Burgdorferi*." *Infect Immun* 72 (3):  
989 1580–86.
- 990 Seshu, J., J. A. Boylan, J. A. Hyde, K. L. Swingle, F. C. Gherardini, and J. T. Skare. 2004. "A  
991 Conservative Amino Acid Change Alters the Function of BosR, the Redox Regulator of  
992 *Borrelia Burgdorferi*." *Mol Microbiol* 54 (5): 1352–63.
- 993 Sismeiro, O., P. Trotot, F. Biville, C. Vivares, and A. Danchin. 1998. "Aeromonas Hydrophila  
994 Adenylyl Cyclase 2: A New Class of Adenylyl Cyclases with Thermophilic Properties and  
995 Sequence Similarities to Proteins from Hyperthermophilic Archaeobacteria." *Journal of*  
996 *Bacteriology* 180 (13): 3339–44. <https://doi.org/10.1128/JB.180.13.3339-3344.1998>.
- 997 Smith, A. H., J. S. Blevins, G. N. Bachlani, X. F. Yang, and M. V. Norgard. 2007. "Evidence That  
998 RpoS (SigmaS) in *Borrelia Burgdorferi* Is Controlled Directly by RpoN (Sigma54/SigmaN)."  
999 *J Bacteriol* 189 (5): 2139–44.
- 1000 Smith, Natasha, Sook-Kyung Kim, Prasad T. Reddy, and D. Travis Gallagher. 2006.  
1001 "Crystallization of the Class IV Adenylyl Cyclase from *Yersinia Pestis*." *Acta*  
1002 *Crystallographica Section F: Structural Biology and Crystallization Communications* 62  
1003 (Pt 3): 200–204. <https://doi.org/10.1107/S1744309106002855>.
- 1004 Smith, Roger S., Matthew C. Wolfgang, and Stephen Lory. 2004. "An Adenylate Cyclase-  
1005 Controlled Signaling Network Regulates *Pseudomonas Aeruginosa* Virulence in a Mouse  
1006 Model of Acute Pneumonia." *Infection and Immunity* 72 (3): 1677–84.  
1007 <https://doi.org/10.1128/iai.72.3.1677-1684.2004>.

- 1008 Stanek, Gerold, and Franc Strle. 2018. "Lyme Borreliosis—from Tick Bite to Diagnosis and  
1009 Treatment." *FEMS Microbiology Reviews* 42 (3): 233–58.  
1010 <https://doi.org/10.1093/femsre/fux047>.
- 1011 Stanley McKnight, G. 1991. "Cyclic AMP Second Messenger Systems." *Current Opinion in Cell  
1012 Biology* 3 (2): 213–17. [https://doi.org/10.1016/0955-0674\(91\)90141-K](https://doi.org/10.1016/0955-0674(91)90141-K).
- 1013 Steere, Allen C., Franc Strle, Gary P. Wormser, Linden T. Hu, John A. Branda, Joppe W. R. Hovius,  
1014 Xin Li, and Paul S. Mead. 2016. "Lyme Borreliosis." *Nature Reviews. Disease Primers* 2:  
1015 16090. <https://doi.org/10.1038/nrdp.2016.90>.
- 1016 Stevenson, B., T. G. Schwan, and P. A. Rosa. 1995. "Temperature-Related Differential Expression  
1017 of Antigens in the Lyme Disease Spirochete, *Borrelia burgdorferi*." *Infection & Immunity*  
1018 63 (11): 4535–39.
- 1019 Sultan, Syed Z., Joshua E. Pitzer, Tristan Boquoi, Gerry Hobbs, Michael R. Miller, and M. A.  
1020 Motaleb. 2011. "Analysis of the HD-GYP Domain Cyclic Dimeric GMP Phosphodiesterase  
1021 Reveals a Role in Motility and the Enzootic Life Cycle of *Borrelia burgdorferi*." *Infection  
1022 and Immunity* 79 (8): 3273–83. <https://doi.org/10.1128/IAI.05153-11>.
- 1023 Sultan, Syed Z., Joshua E. Pitzer, Michael R. Miller, and Md A. Motaleb. 2010. "Analysis of a  
1024 *Borrelia burgdorferi* Phosphodiesterase Demonstrates a Role for Cyclic-Di-Guanosine  
1025 Monophosphate in Motility and Virulence." *Molecular Microbiology* 77 (1): 128–42.  
1026 <https://doi.org/10.1111/j.1365-2958.2010.07191.x>.
- 1027 Tokarz, Rafal, Julie M. Anderton, Laura I. Katona, and Jorge L. Benach. 2004. "Combined Effects  
1028 of Blood and Temperature Shift on *Borrelia burgdorferi* Gene Expression as Determined  
1029 by Whole Genome DNA Array." *Infection and Immunity* 72 (9): 5419–32.  
1030 <https://doi.org/10.1128/IAI.72.9.5419-5432.2004>.
- 1031 Wu, Jing, Eric H. Weening, Jennifer B. Faske, Magnus Höök, and Jon T. Skare. 2011. "Invasion of  
1032 Eukaryotic Cells by *Borrelia burgdorferi* Requires B1 Integrins and Src Kinase Activity."  
1033 *Infection and Immunity* 79 (3): 1338–48. <https://doi.org/10.1128/IAI.01188-10>.
- 1034 Yang, X. F., M. C. Lybecker, U. Pal, S. M. Alani, J. Blevins, A. T. Revel, D. S. Samuels, and M. V.  
1035 Norgard. 2005. "Analysis of the OspC Regulatory Element Controlled by the RpoN-RpoS  
1036 Regulatory Pathway in *Borrelia burgdorferi*." *J Bacteriol* 187 (14): 4822–29.
- 1037 Yang, X., M. S. Goldberg, T. G. Popova, G. B. Schoeler, S. K. Wikel, K. E. Hagman, and M. V.  
1038 Norgard. 2000. "Interdependence of Environmental Factors Influencing Reciprocal  
1039 Patterns of Gene Expression in Virulent *Borrelia burgdorferi*." *Mol Microbiol* 37 (6):  
1040 1470-9.
- 1041 Yang, Xiaofeng F., Sophie M. Alani, and Michael V. Norgard. 2003. "The Response Regulator  
1042 Rrp2 Is Essential for the Expression of Major Membrane Lipoproteins in *Borrelia  
1043 burgdorferi*." *Proceedings of the National Academy of Sciences* 100 (19): 11001–6.  
1044 <https://doi.org/10.1073/pnas.1834315100>.
- 1045 Ye, Meiping, Jun-Jie Zhang, Xin Fang, Gavin B. Lawlis, Bryan Troxell, Yan Zhou, Mark Gomelsky,  
1046 Yongliang Lou, and X. Frank Yang. 2014. "DhhP, a Cyclic Di-AMP Phosphodiesterase of  
1047 *Borrelia burgdorferi*, Is Essential for Cell Growth and Virulence." *Infection and Immunity*  
1048 82 (5): 1840–49. <https://doi.org/10.1128/IAI.00030-14>.
- 1049 Yin, Wen, Xia Cai, Hongdan Ma, Li Zhu, Yuling Zhang, Shan-Ho Chou, Michael Y Galperin, and Jin  
1050 He. 2020. "A Decade of Research on the Second Messenger C-Di-AMP." *FEMS  
1051 Microbiology Reviews* 44 (6): 701–24. <https://doi.org/10.1093/femsre/fuaa019>.

1052 Zhang, Jun-Jie, Tong Chen, Youyun Yang, Jimei Du, Hongxia Li, Bryan Troxell, Ming He, Sebastian  
1053 E. Carrasco, Mark Gomelsky, and X. Frank Yang. 2018. "Positive and Negative Regulation  
1054 of Glycerol Utilization by the C-Di-GMP Binding Protein PlzA in *Borrelia burgdorferi*."  
1055 *Journal of Bacteriology* 200 (22). <https://doi.org/10.1128/JB.00243-18>.

1056

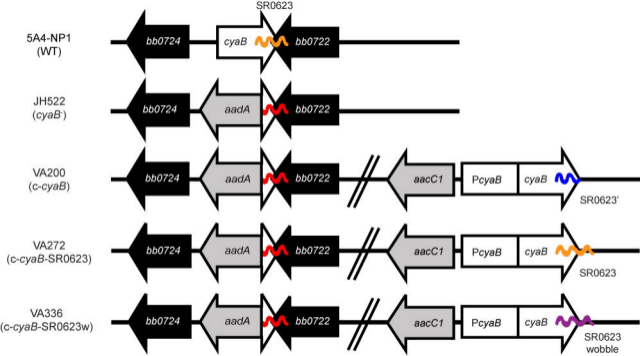



A

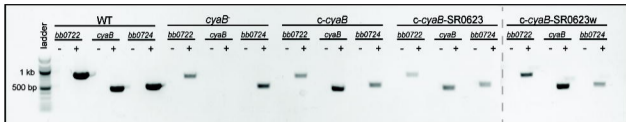

B

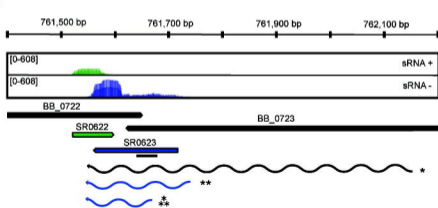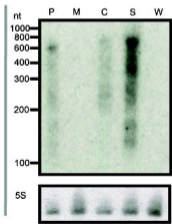

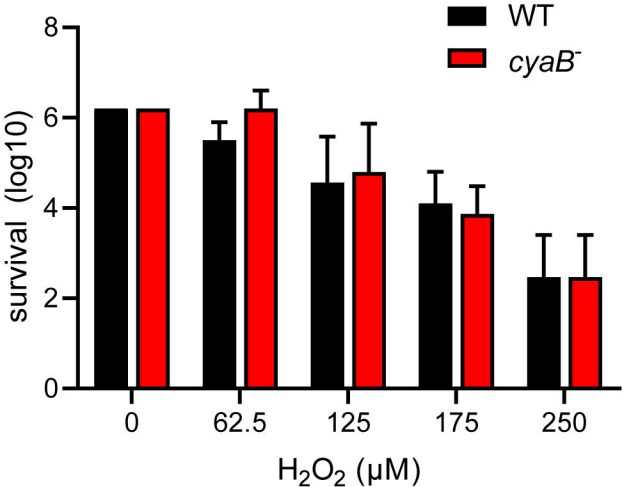

A

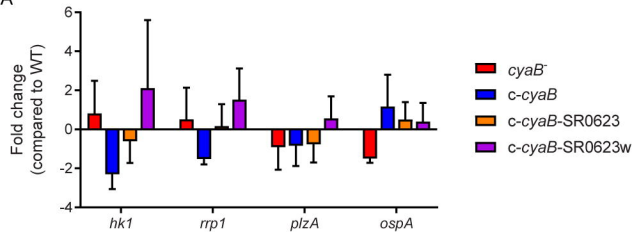

B

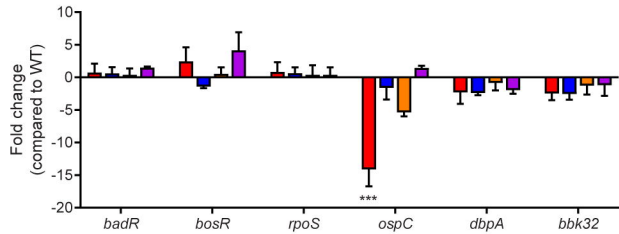

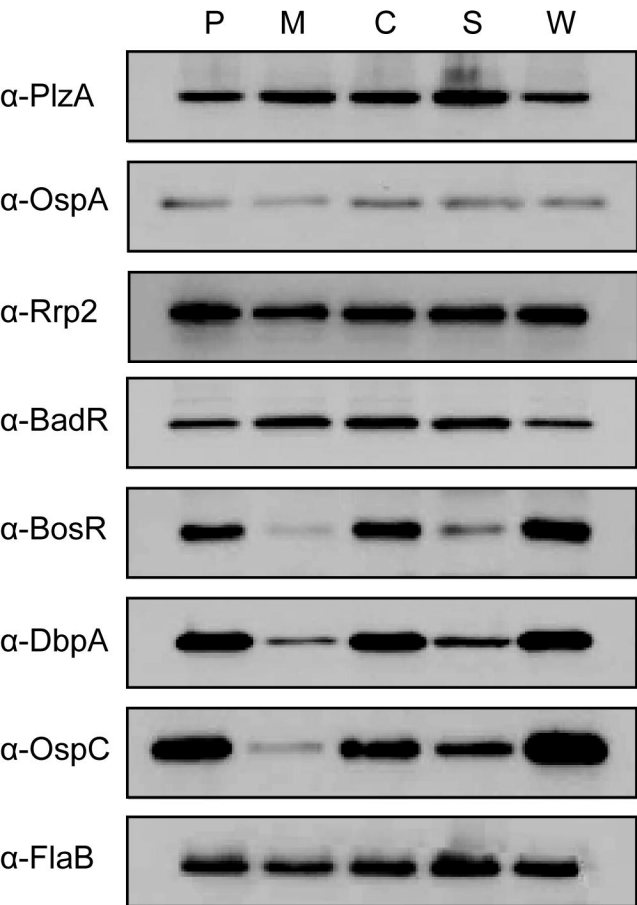

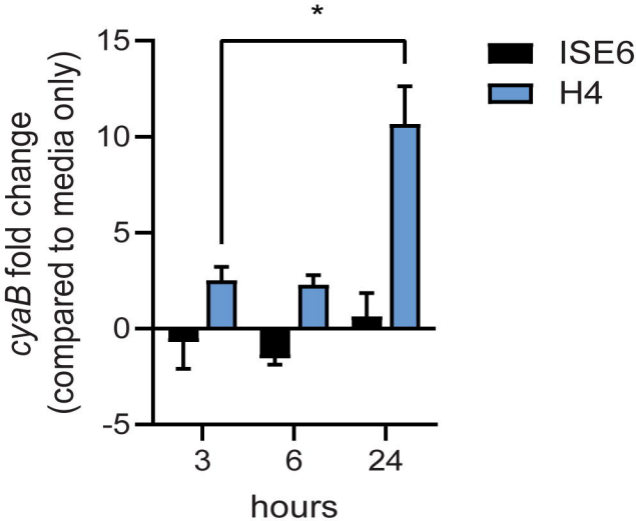

A

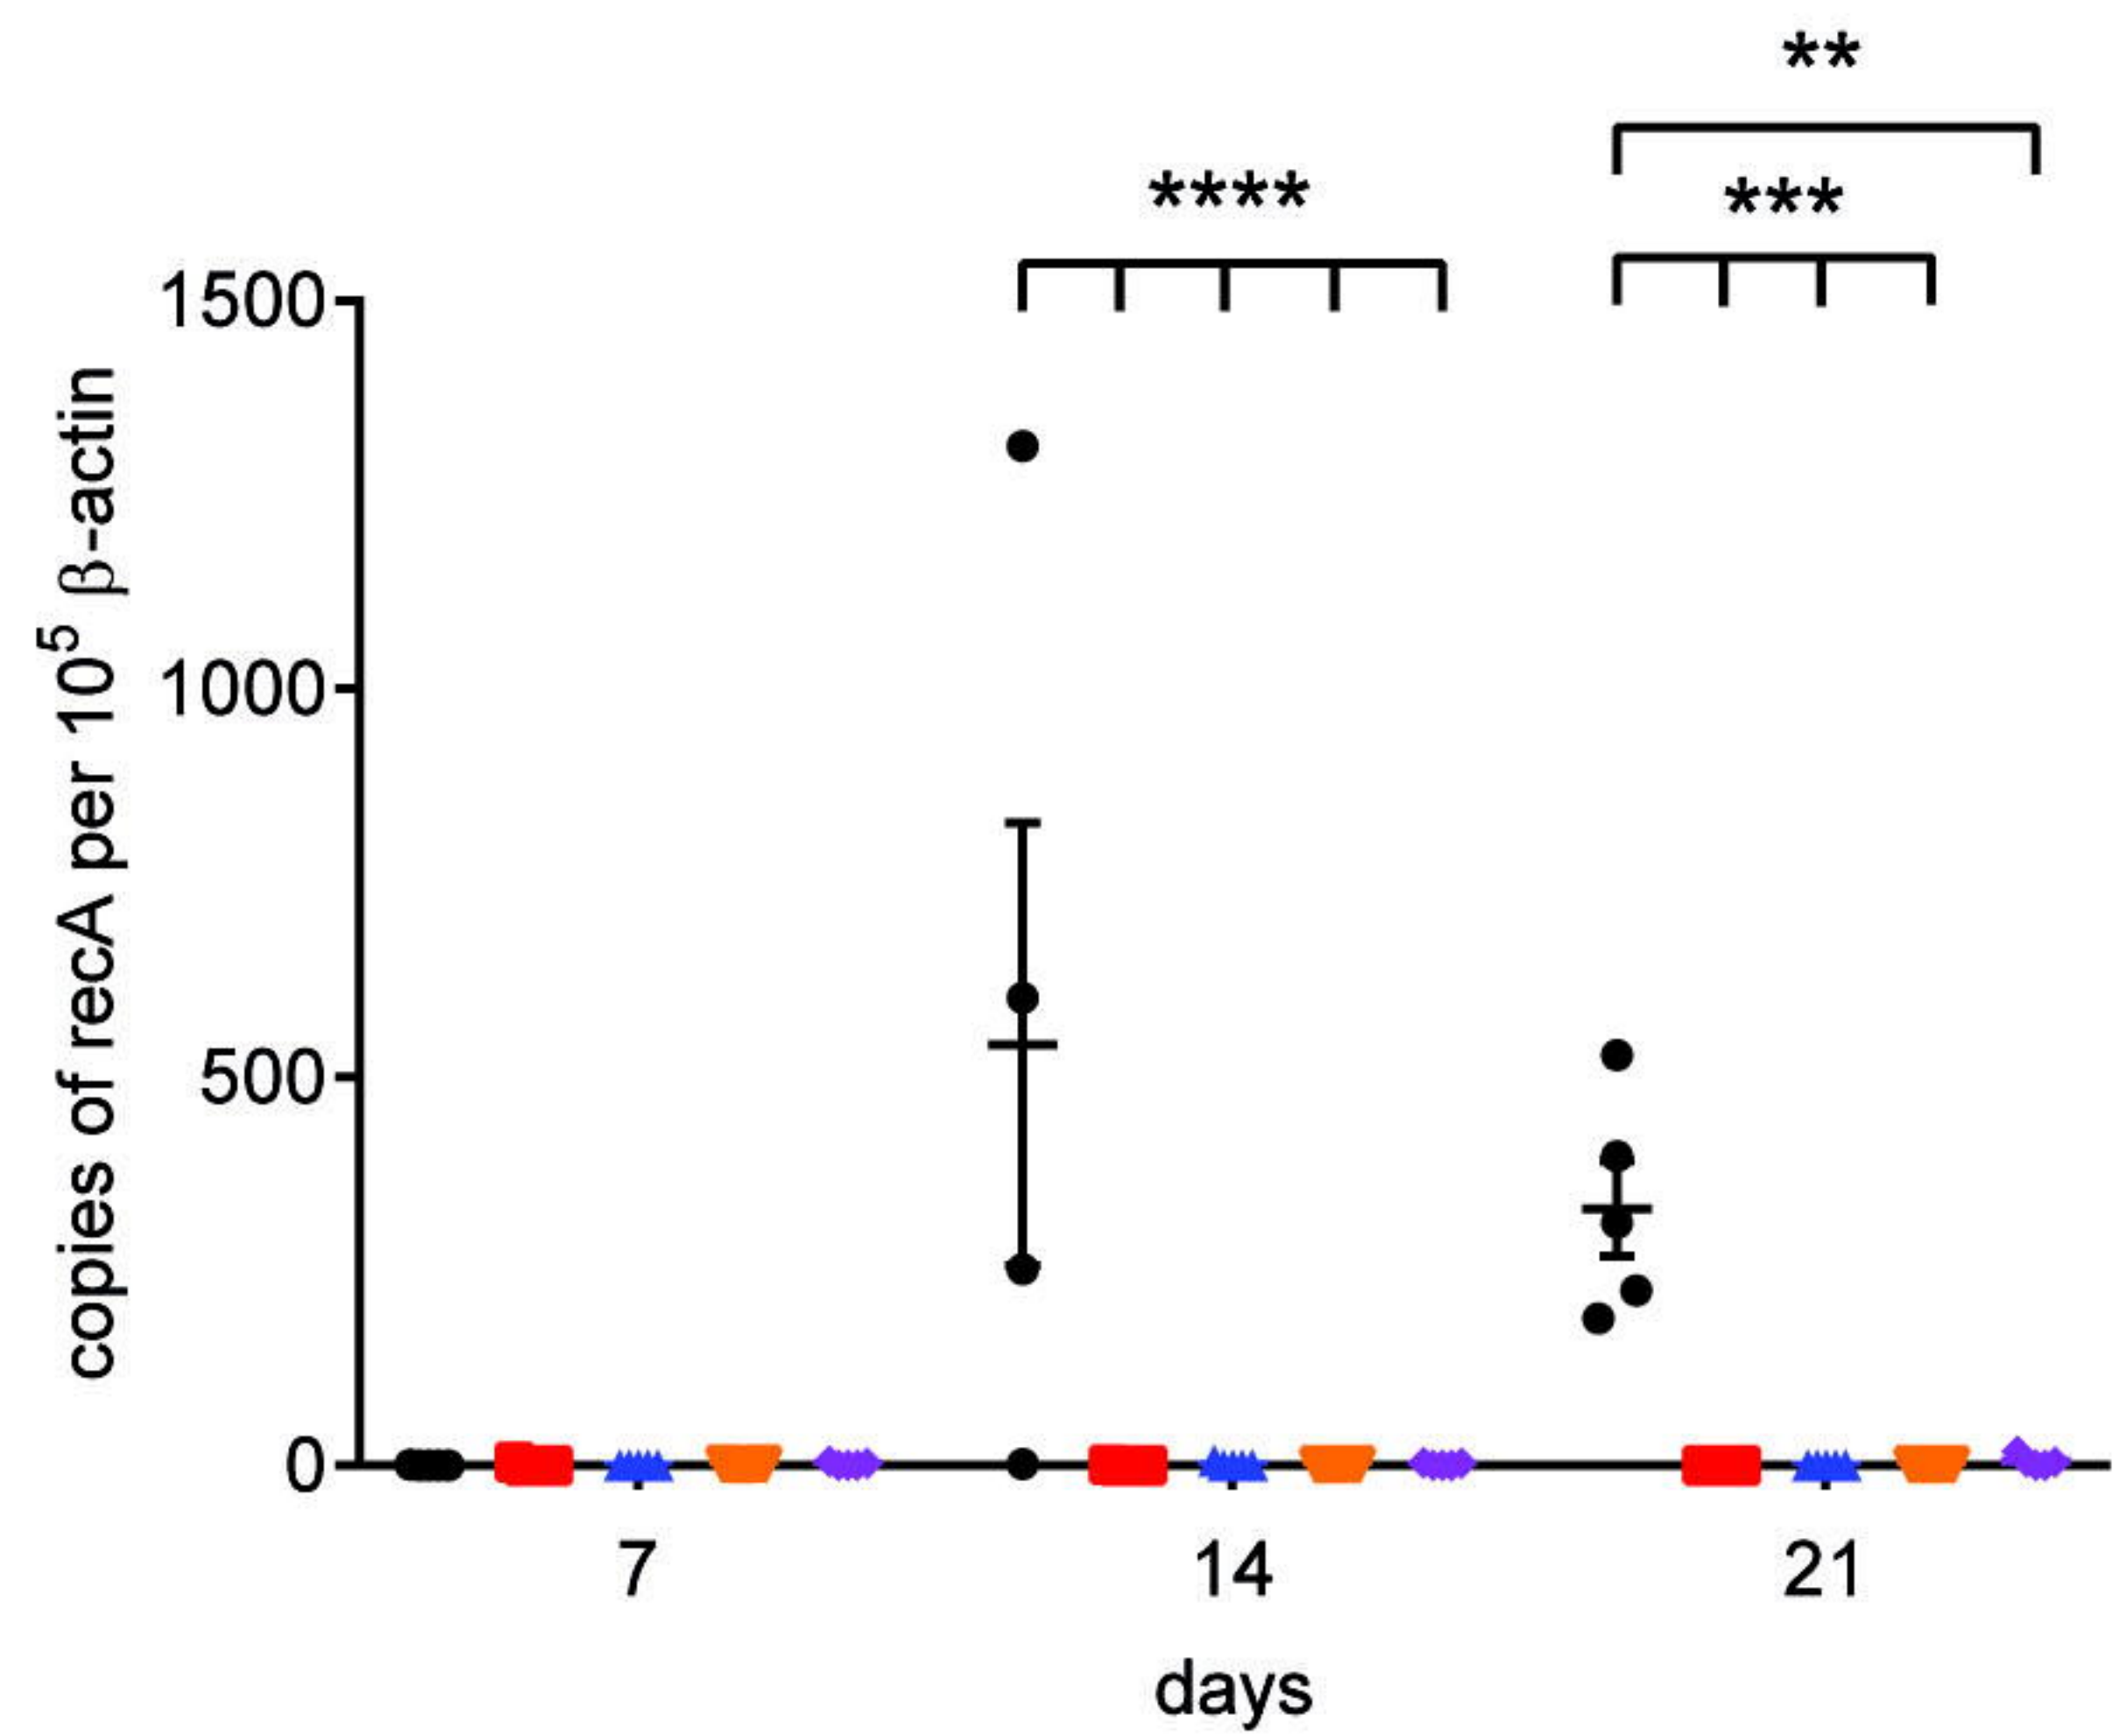

B

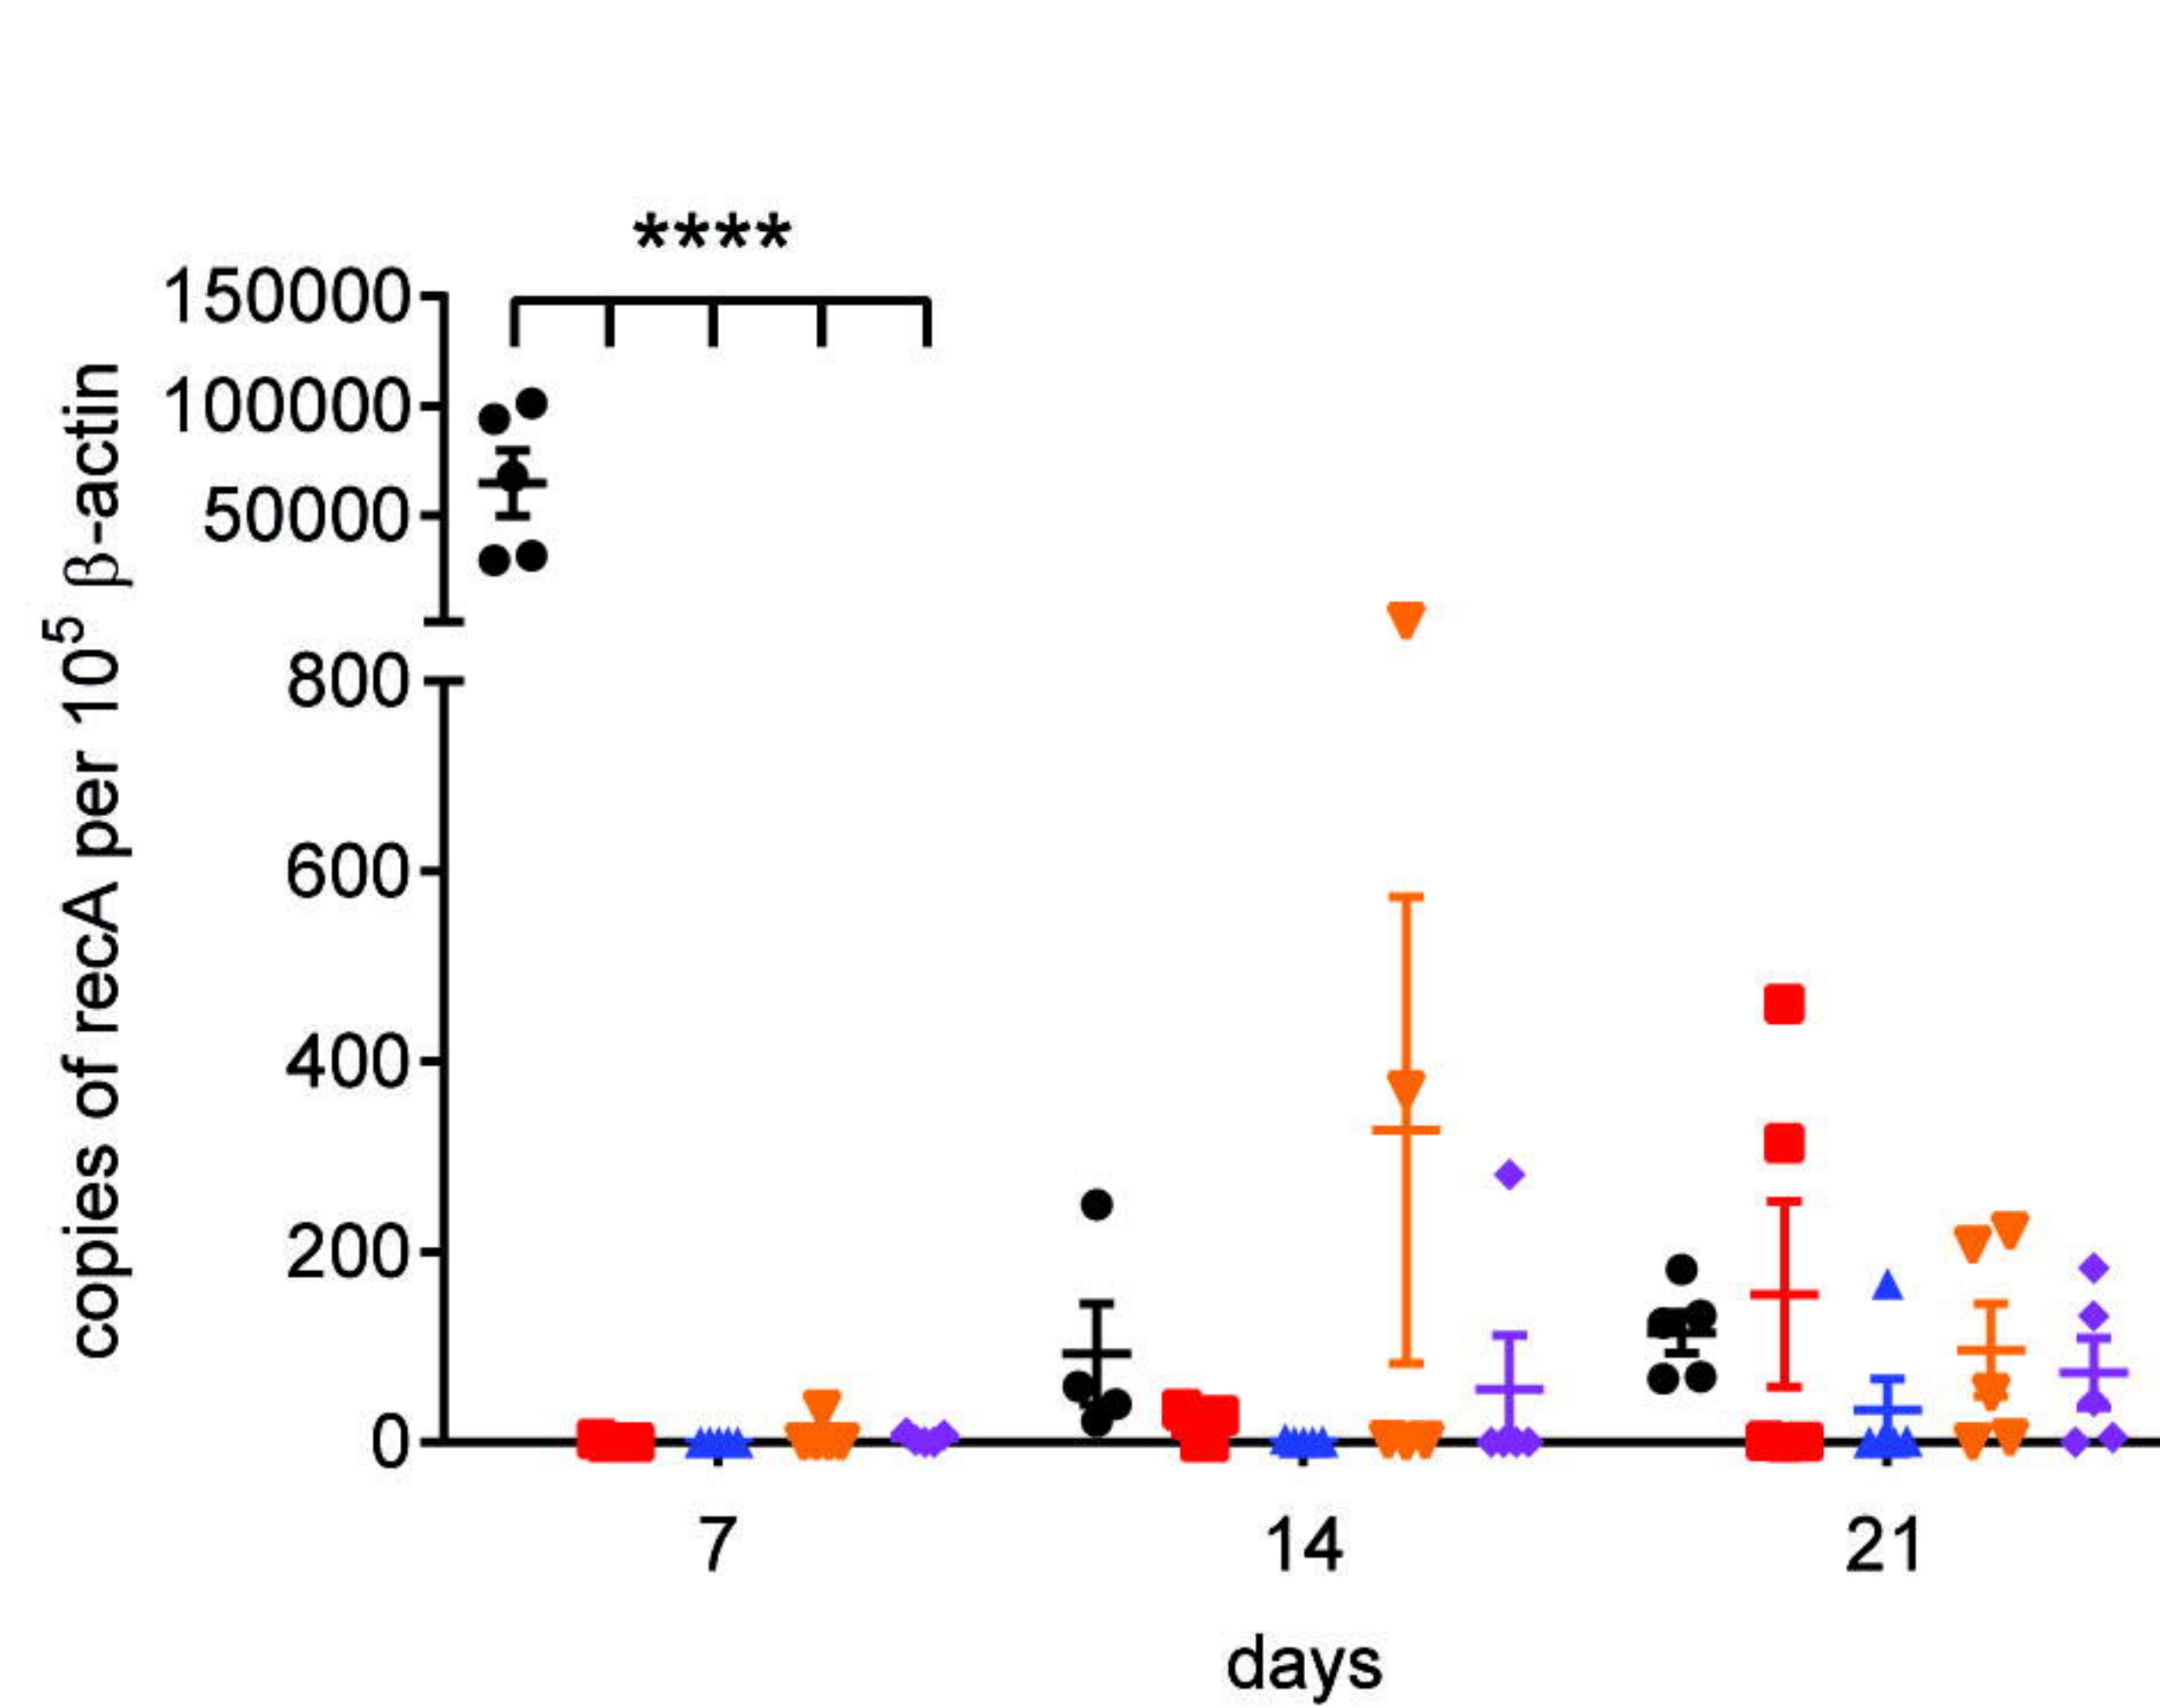

C

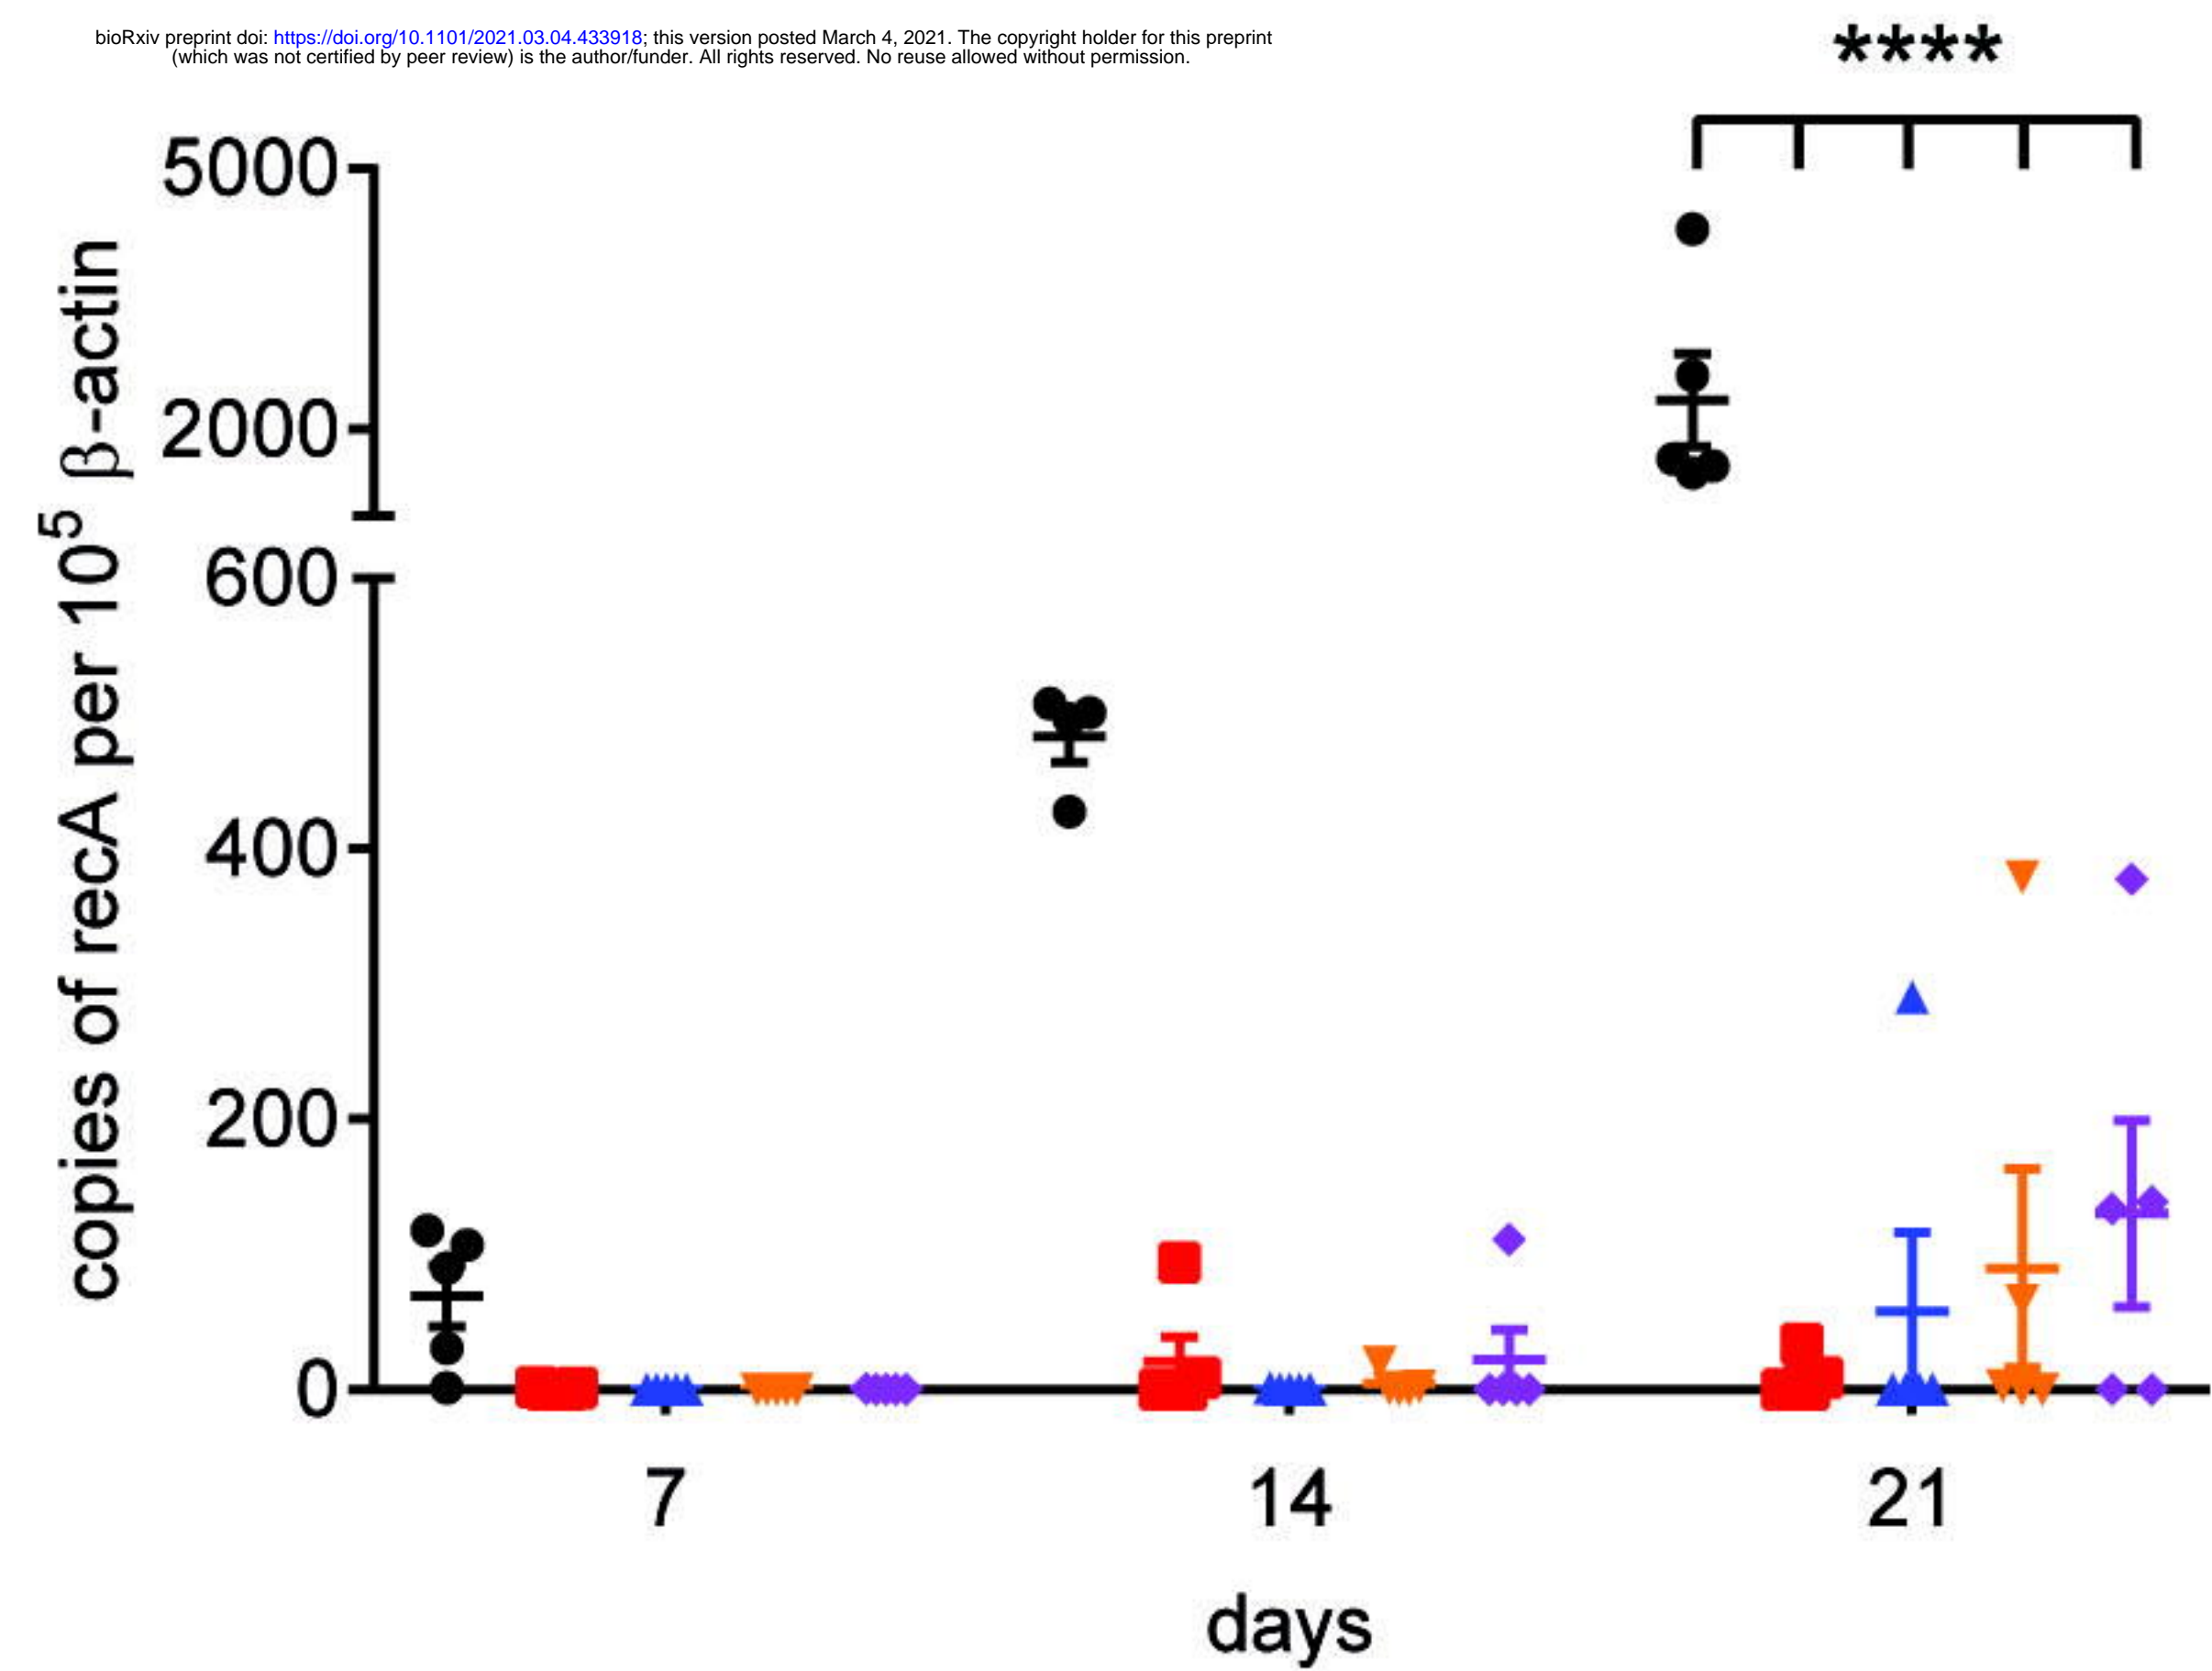

D

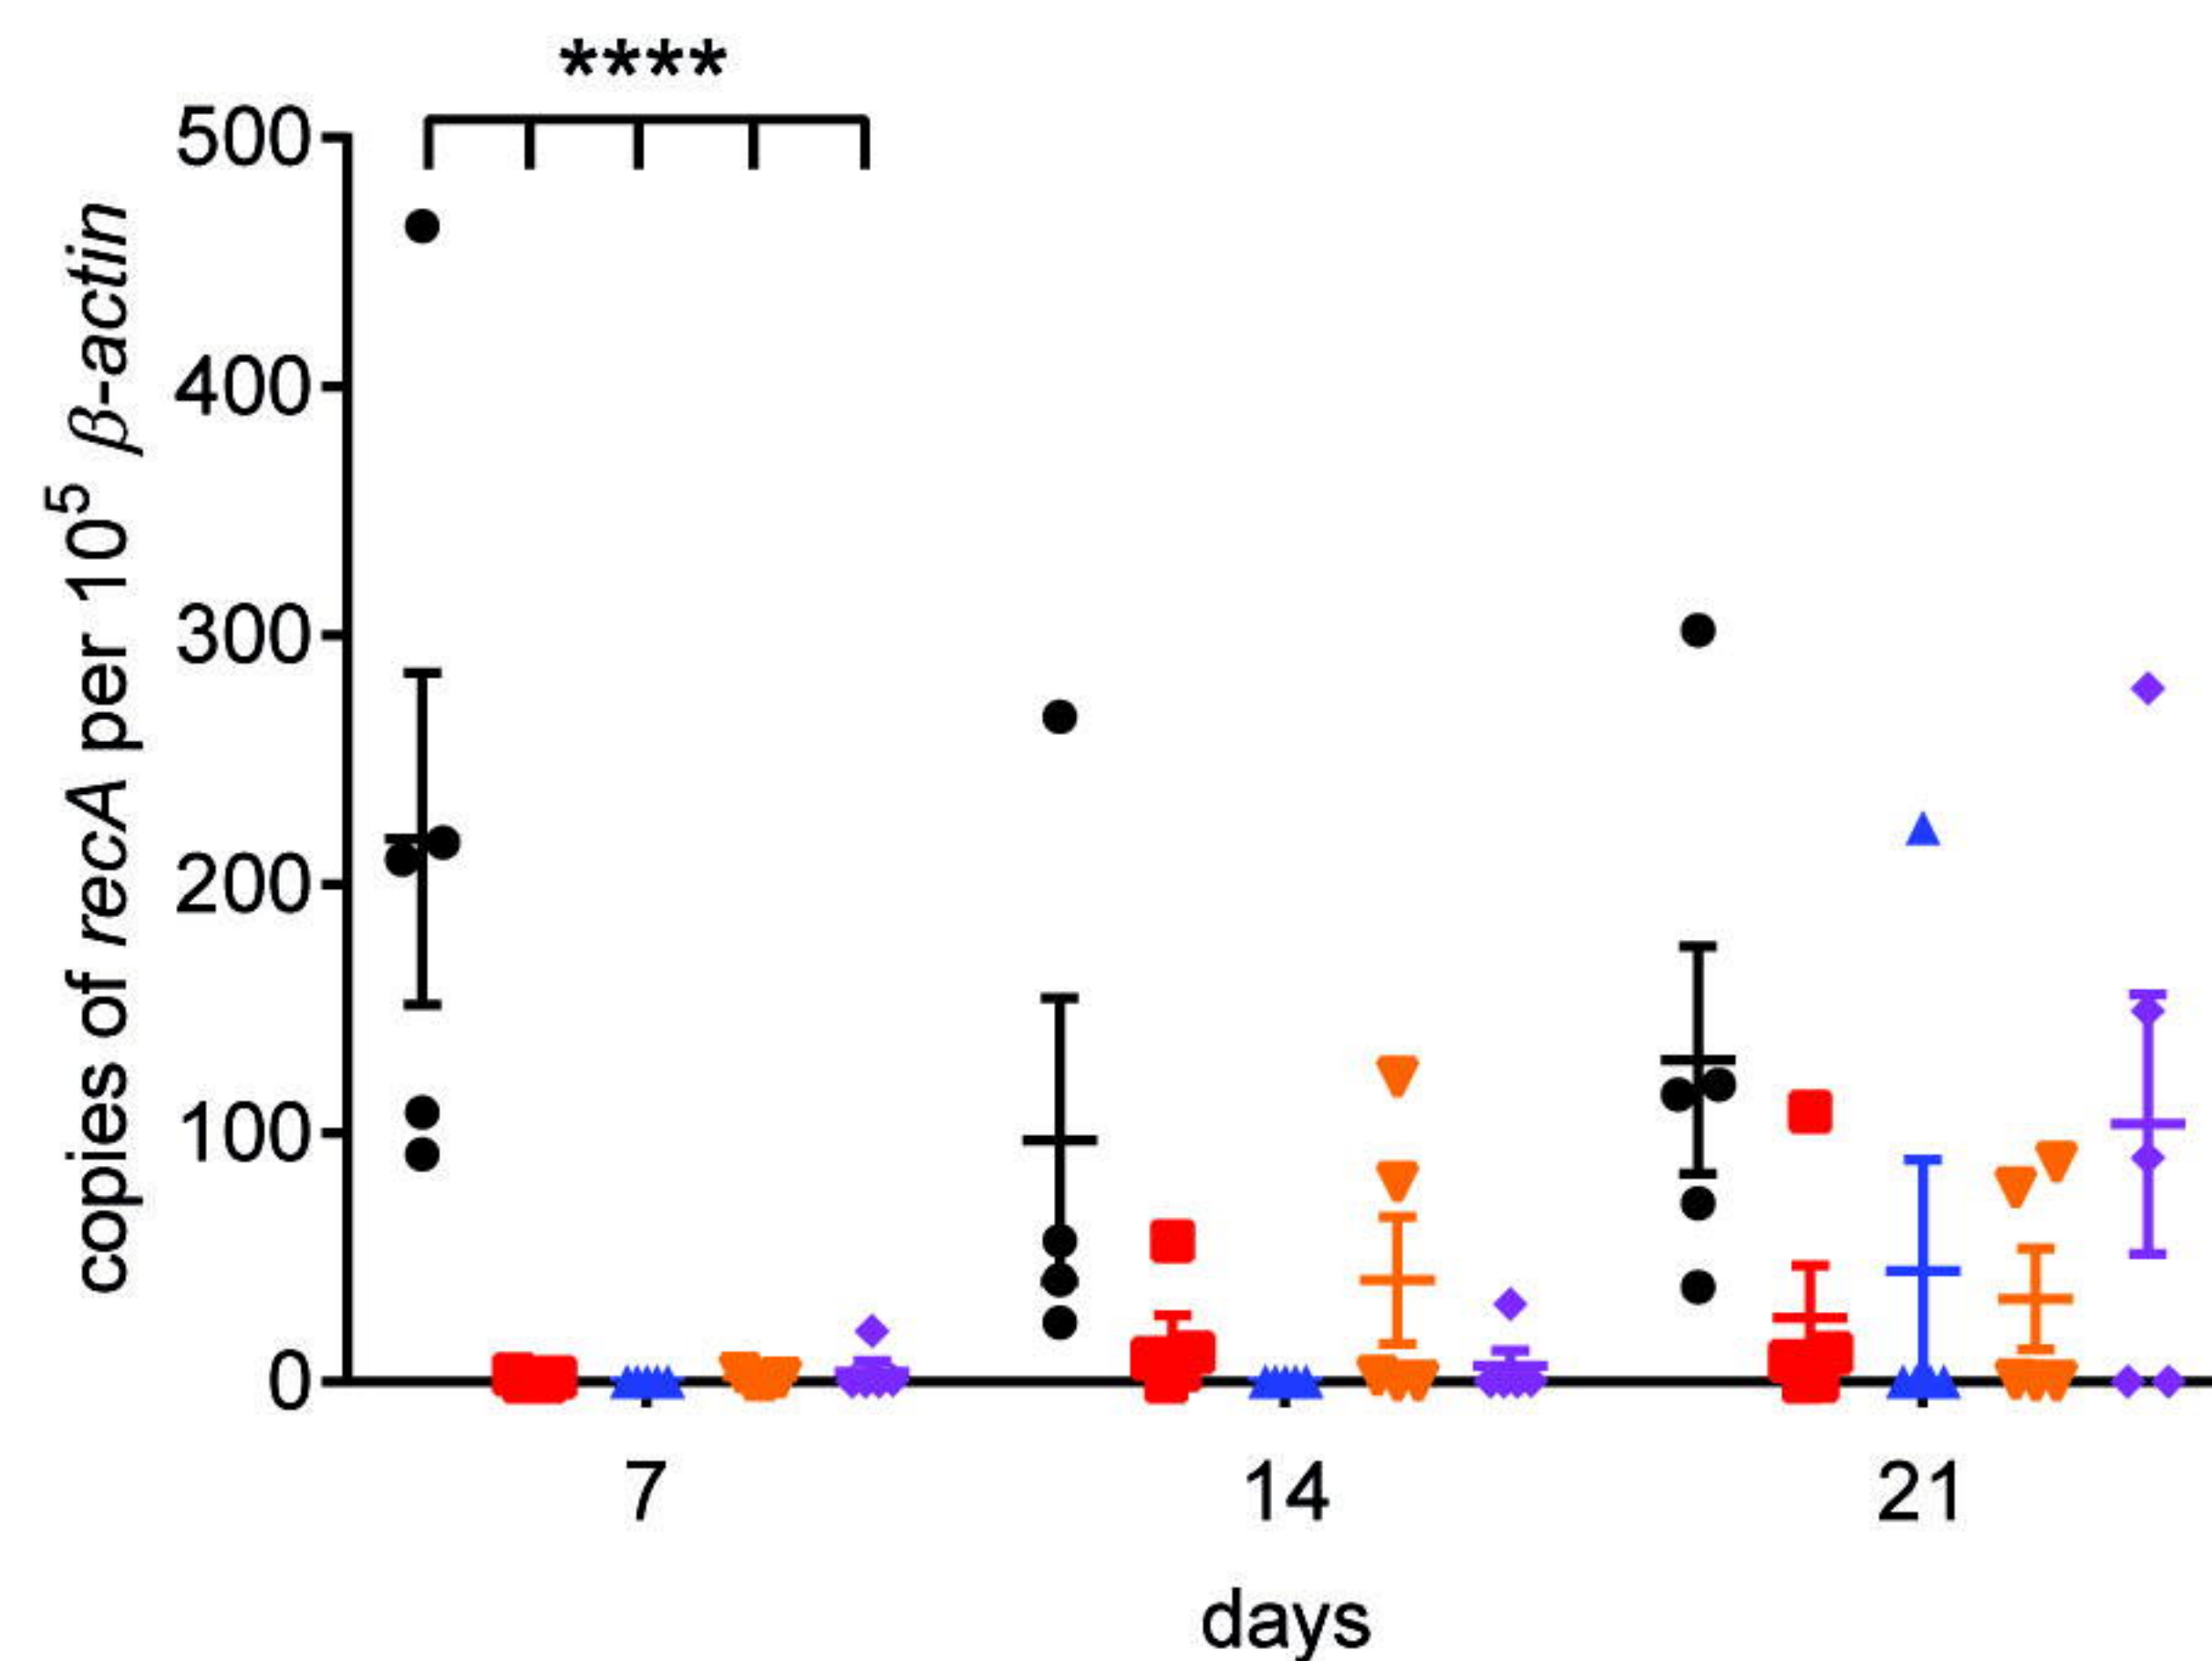

● WT    ■ *cyaB*<sup>-</sup>    ▲ *c-cyaB*    ▼ *c-cyaB-SR0623*    ◆ *c-cyaB-SR0623w*



**A**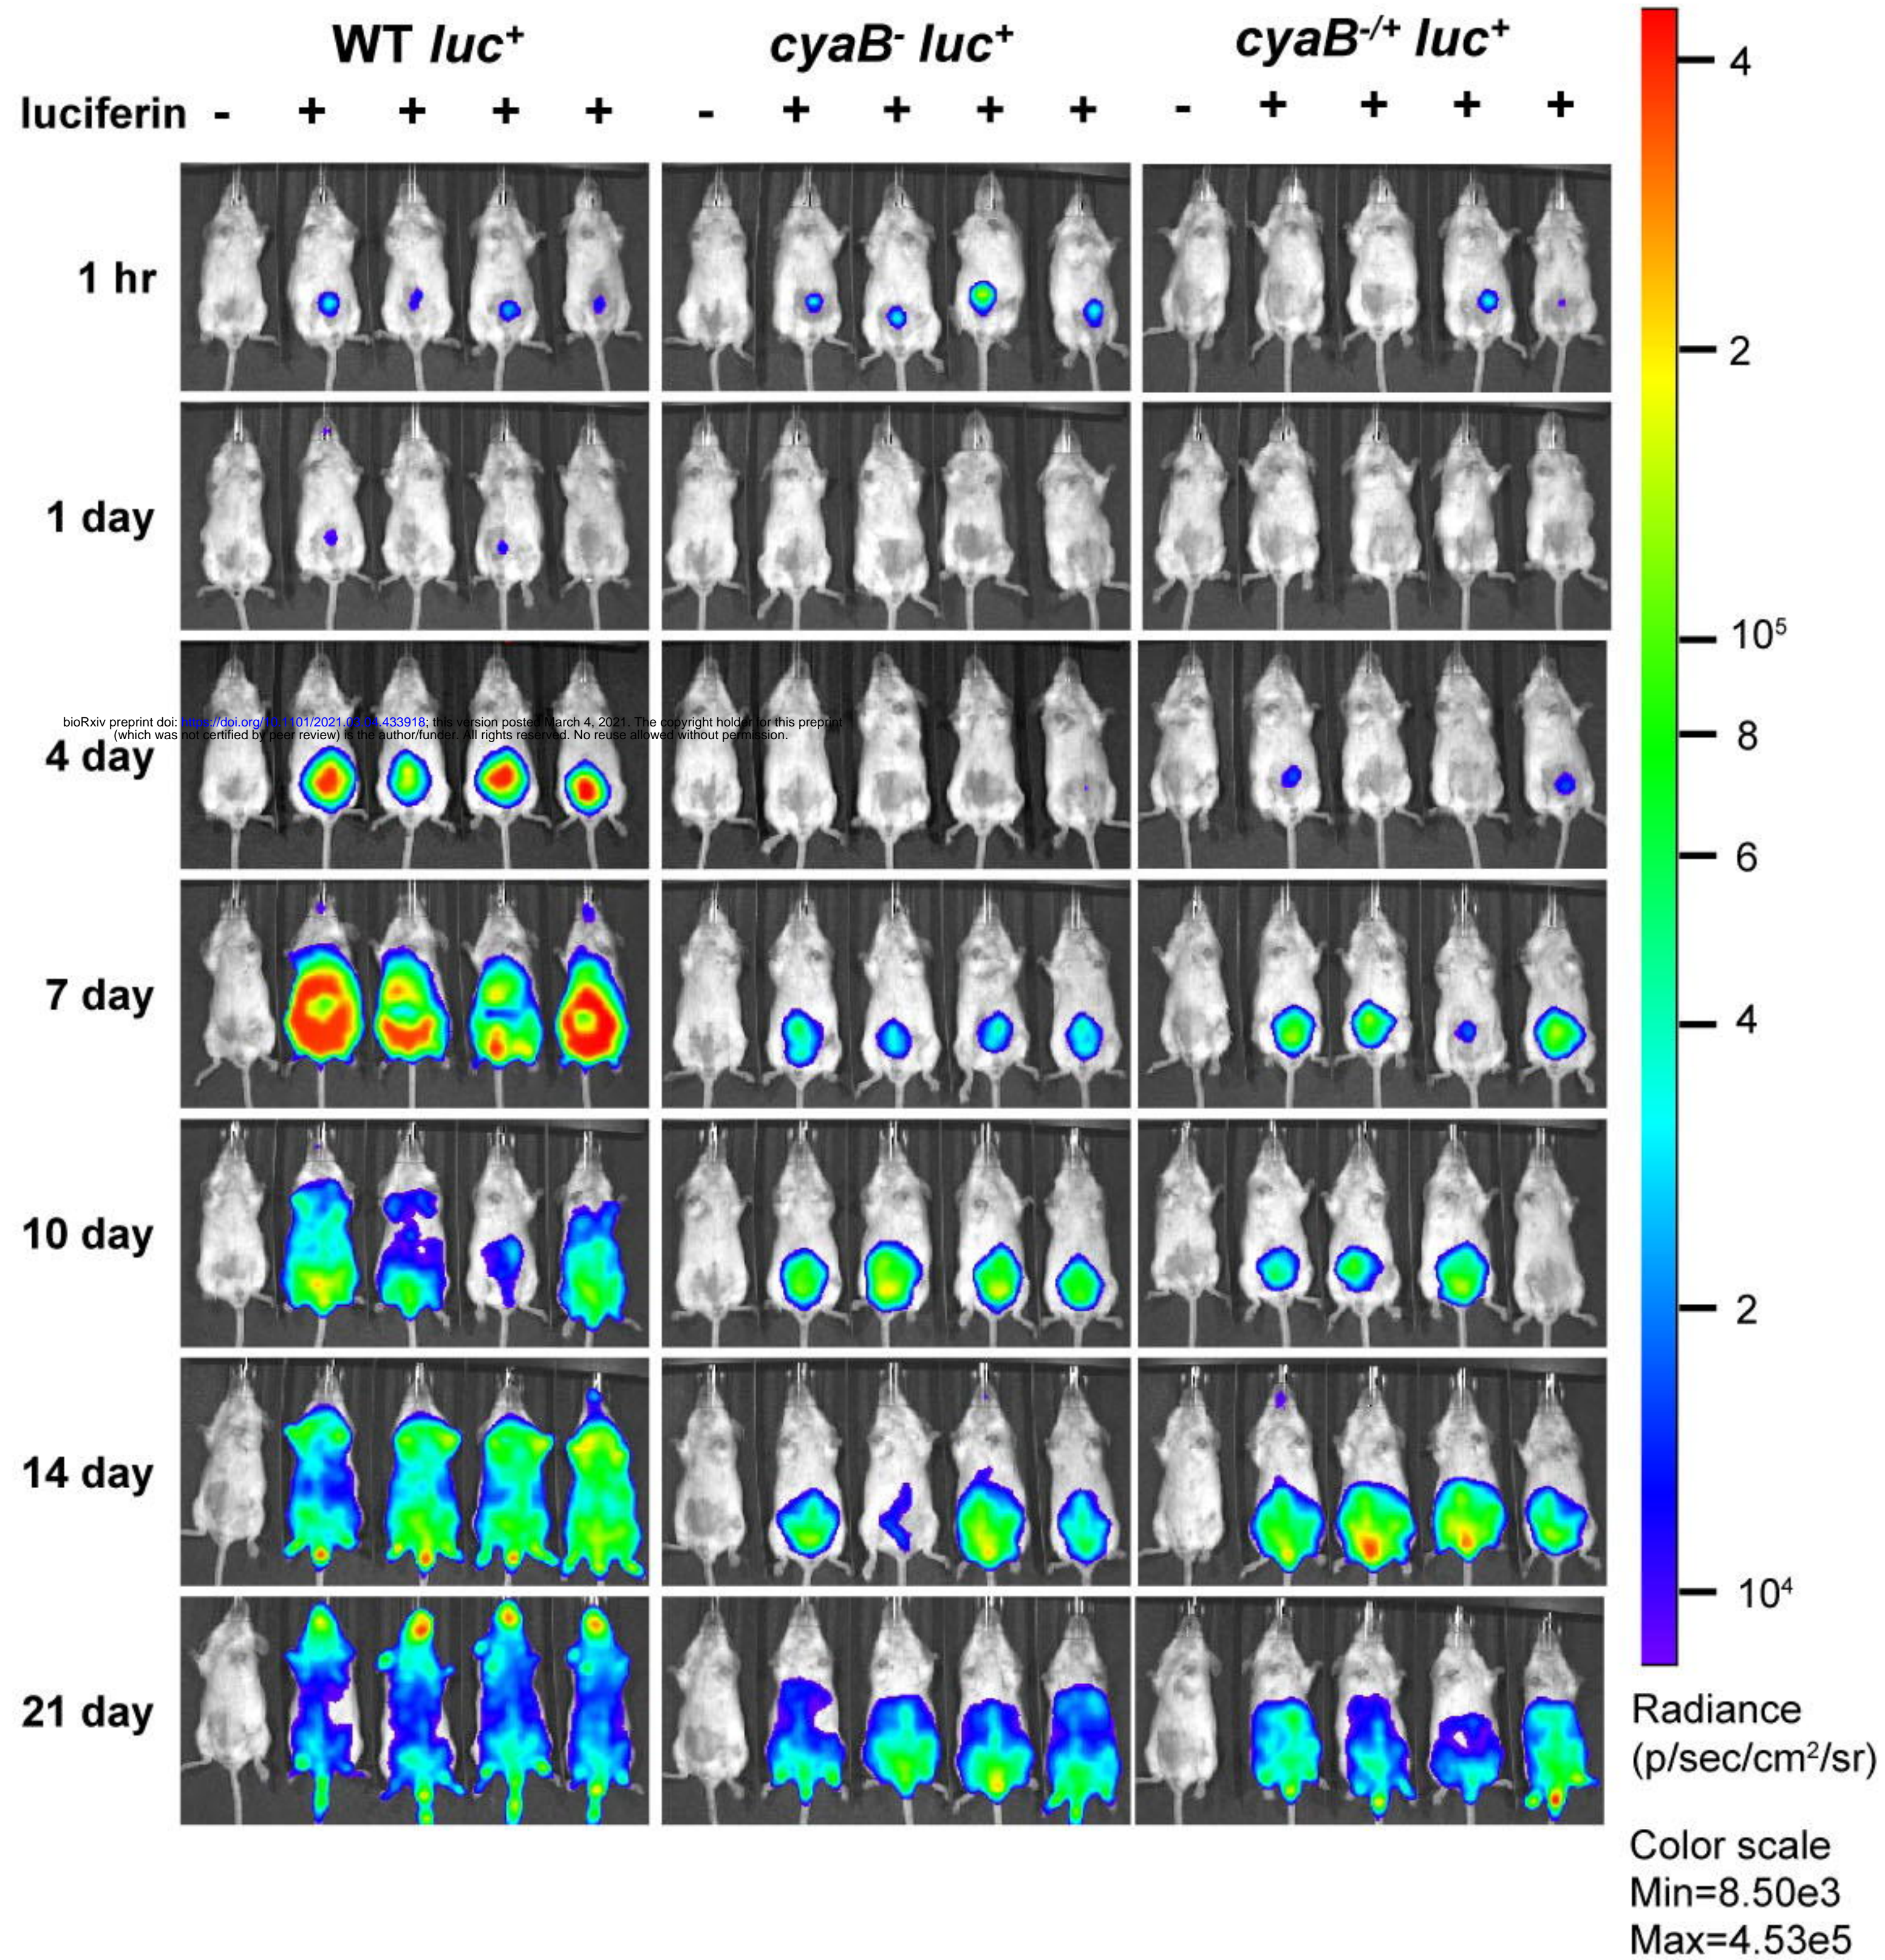**B**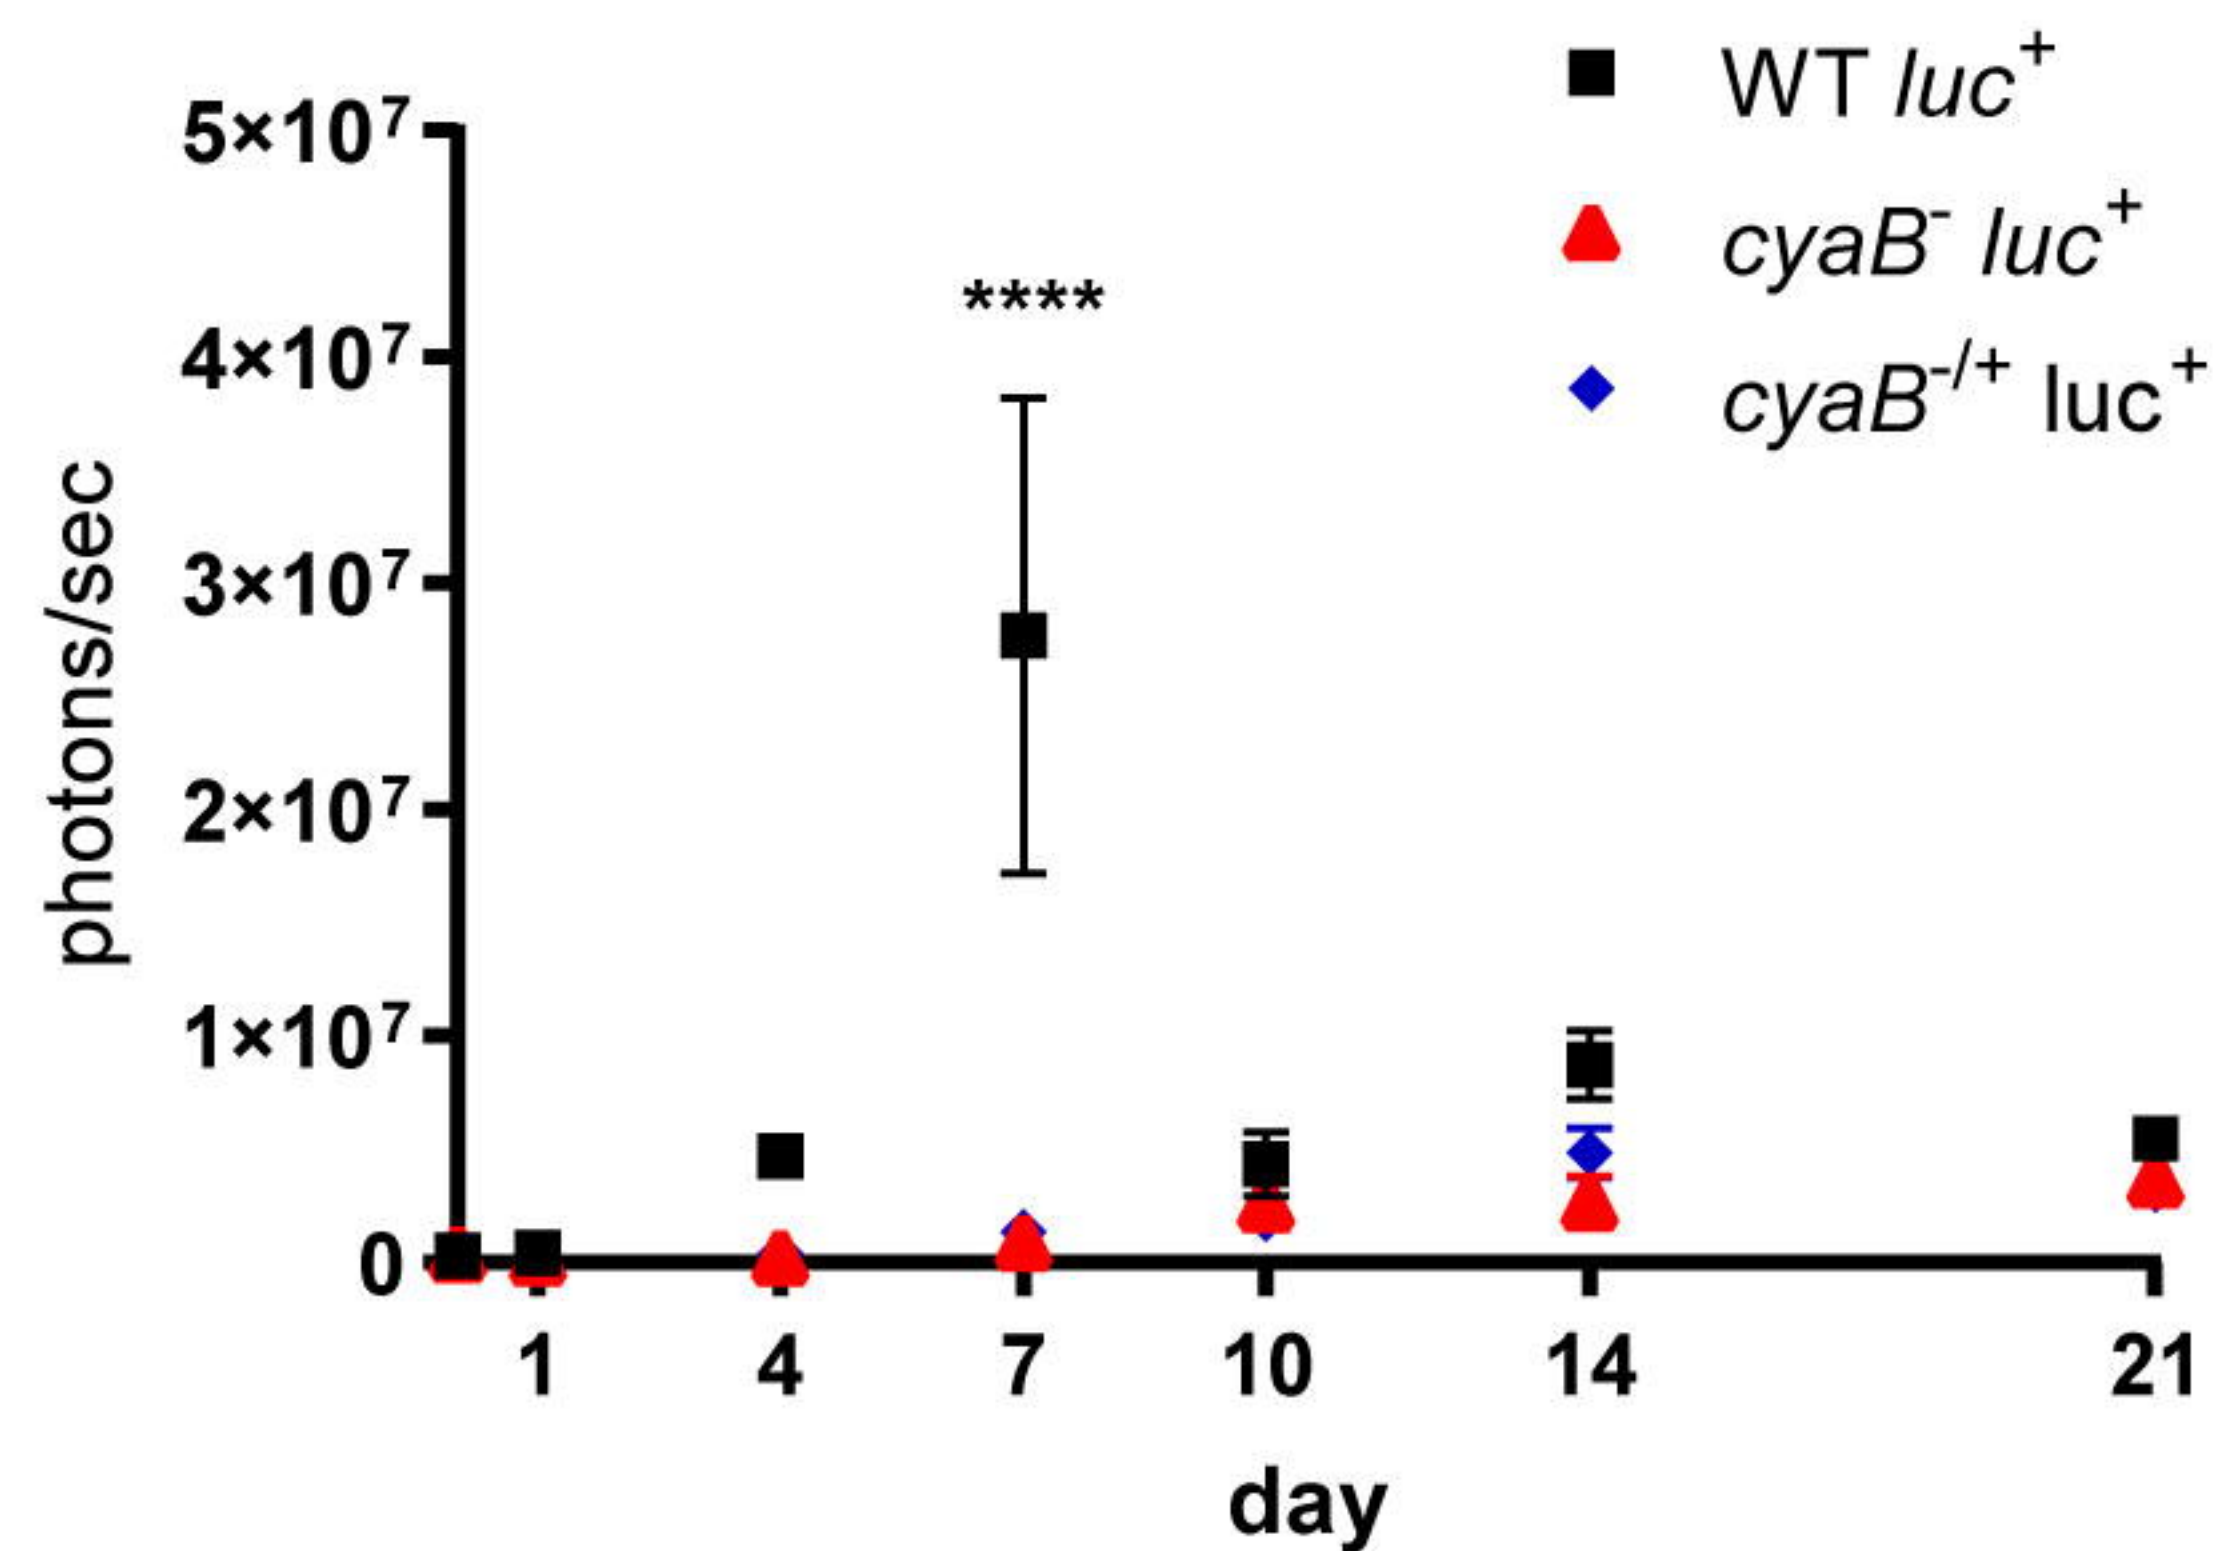**C**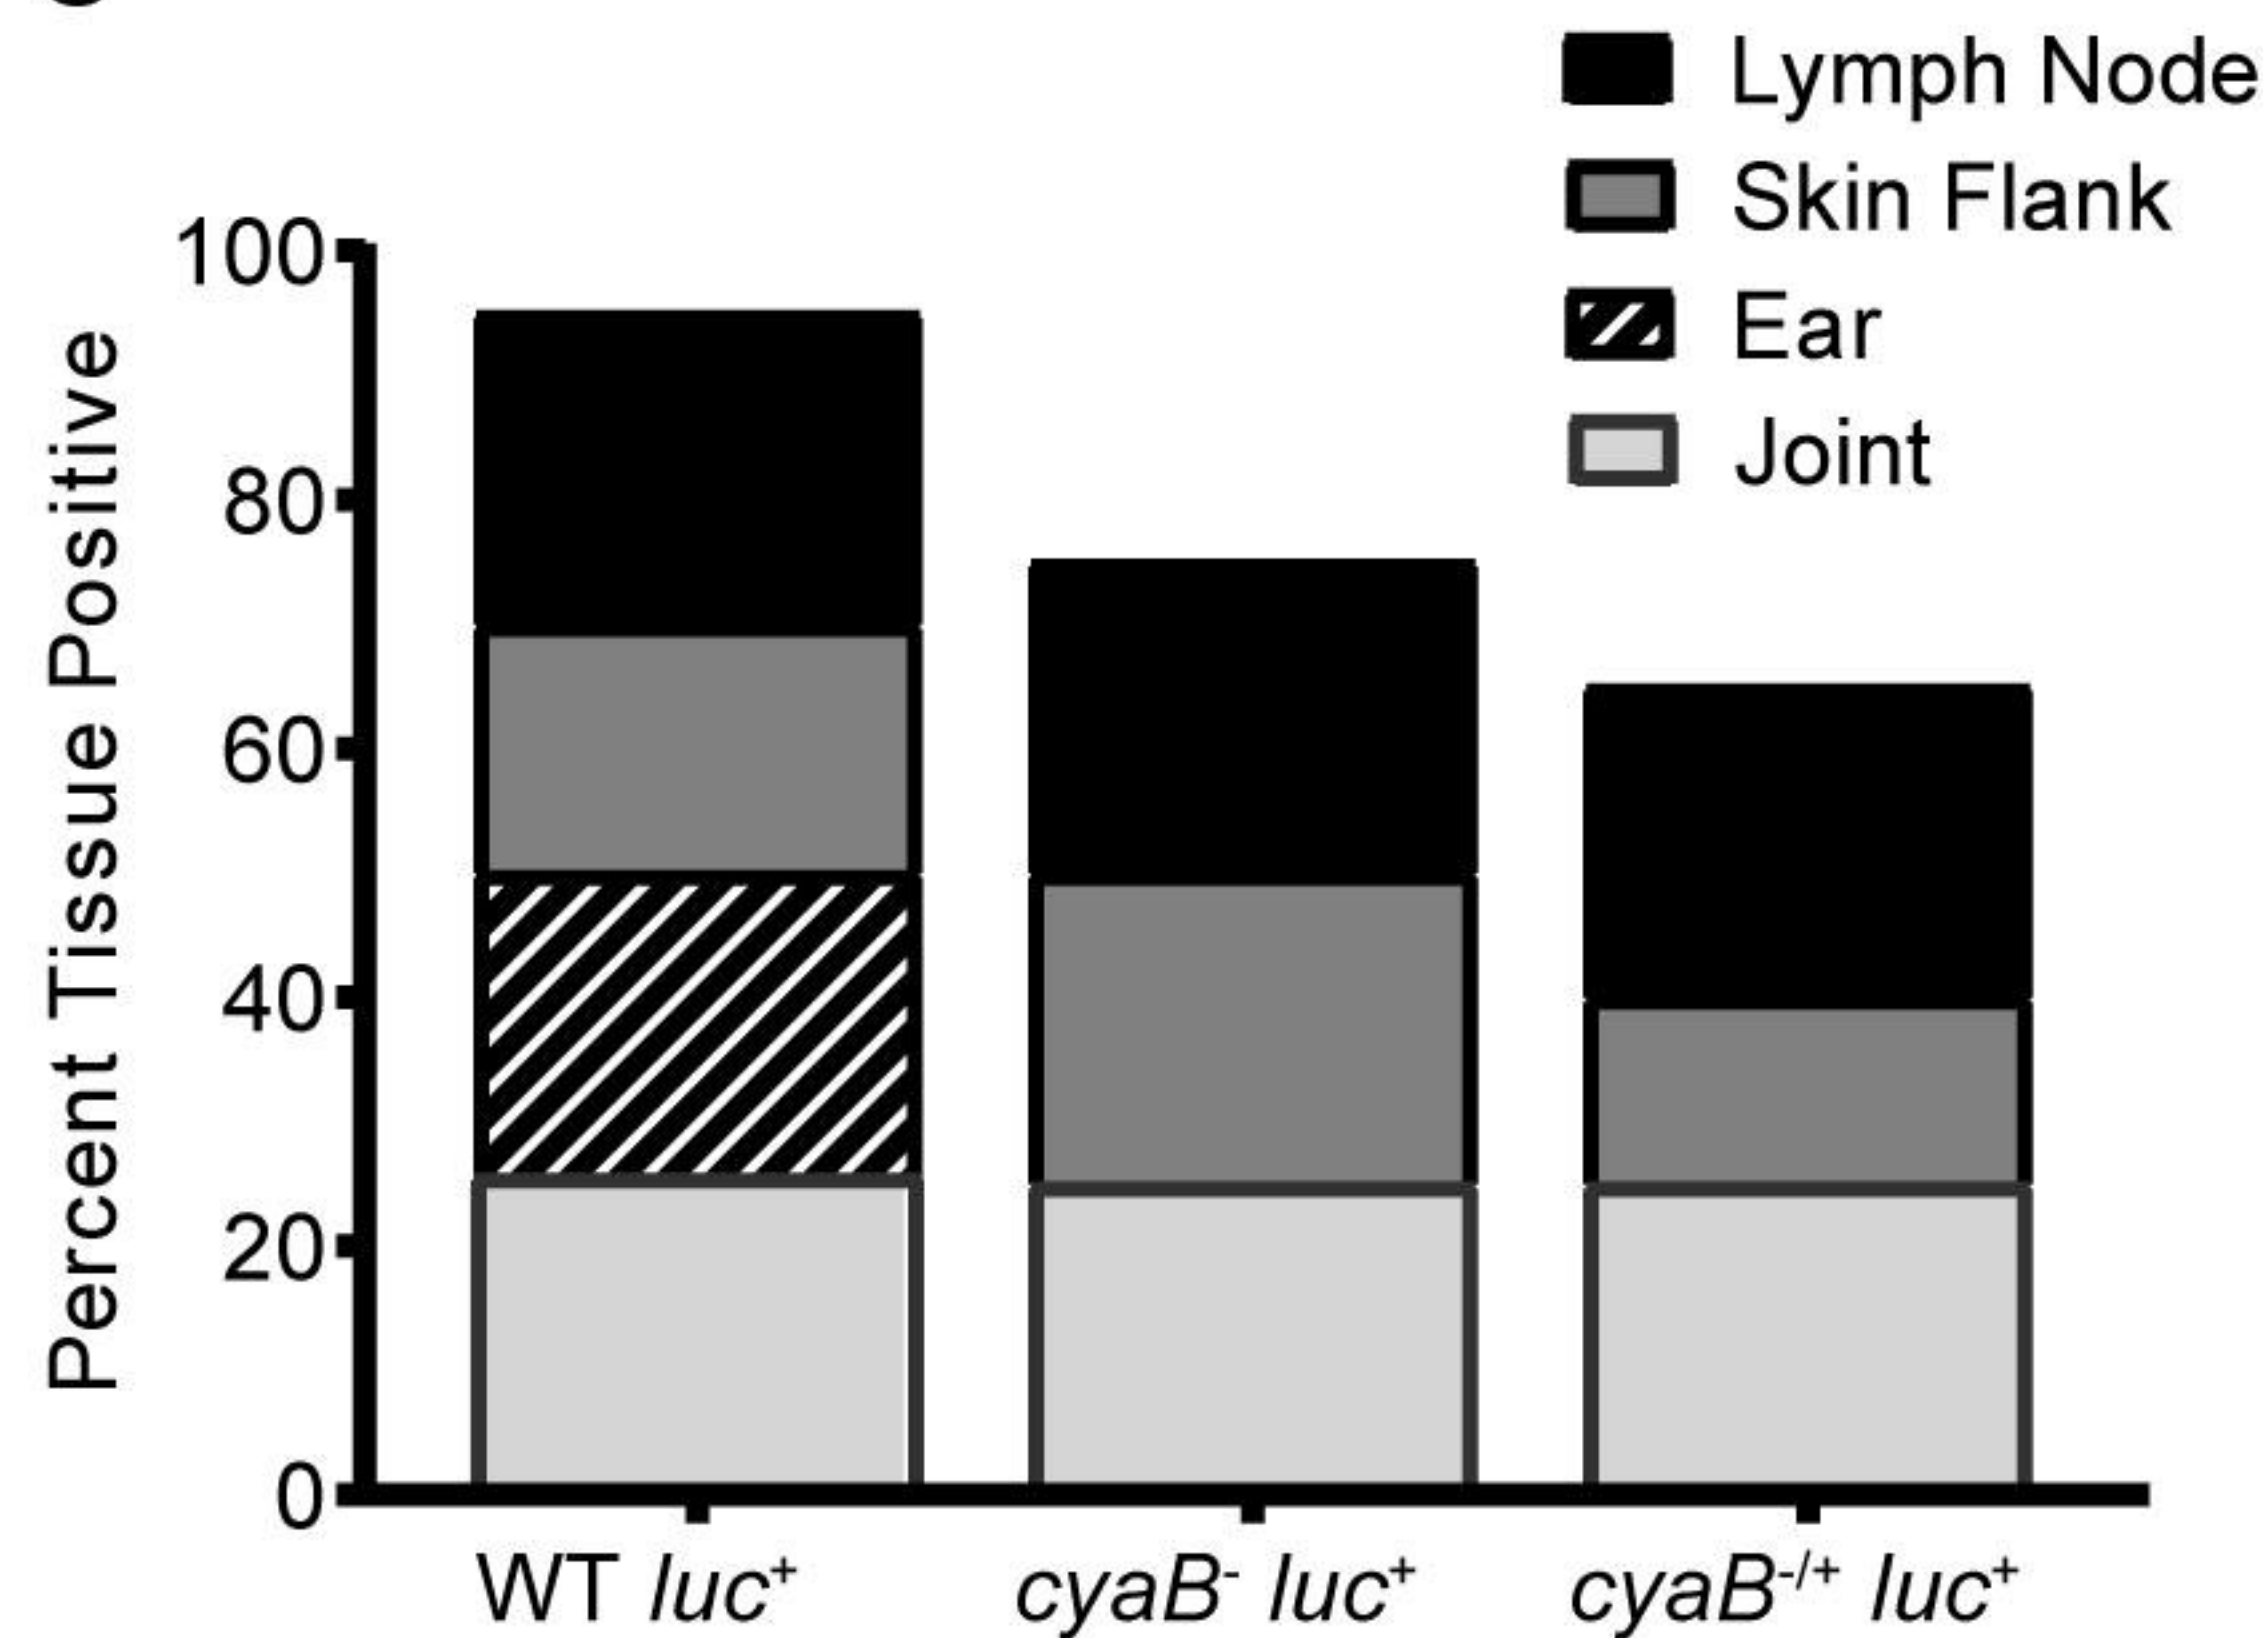

Source: https://biorxiv.org/content/10.1101/2021.03.04.433918v1.full.pdf
